# Supplementary material for: Phosphine-mediated enantioselective [1 + 4]-annulation of Morita–Baylis–Hillman carbonates with 2-enoylpyridines
Source: Royal Society of Chemistry journal article supplement (doi:10.1039/c8ra09453e), 2018-01-01

## Phosphine-Mediated Enantioselective [1+4] Annulation of Morita-Baylis-Hillman Carbonates with 2-Enoylpyridines

Tao Wang,<sup>†a</sup> Pengfei Zhang,<sup>†b,a</sup> Wenjun Li,<sup>c\*</sup> and Pengfei Li<sup>a\*</sup>

<sup>a</sup> Department of Chemistry and Shenzhen Grubbs Institute, Southern University of Science and Technology, Shenzhen, Guangdong, P. R. China, 518055. Fax: +86-755-88018304. E-mail: [lipf@sustc.edu.cn](mailto:lipf@sustc.edu.cn), [flyli1980@gmail.com](mailto:flyli1980@gmail.com)

<sup>b</sup> School of Chemistry and Chemical Engineering, Harbin Institute of Technology, Harbin, P. R. China, 150080.

<sup>c</sup> Department of Medicinal Chemistry, School of Pharmacy, Qingdao University, Qingdao, Shandong, P. R. China, 266021. E-mail: [liwj@qdu.edu.cn](mailto:liwj@qdu.edu.cn).

<sup>†</sup> The two authors contributed equally to the work.

## Supporting Information

### Contents

|                                   |            |
|-----------------------------------|------------|
| <b>Experimental section</b>       | <b>S2</b>  |
| <b>Compounds characterization</b> | <b>S3</b>  |
| <b>Copies of NMR spectra</b>      | <b>S14</b> |

## Experimental section

### General

All reactions were carried out with dry, freshly distilled solvents in anhydrous conditions. Toluene and THF were distilled from sodium, while dichloromethane was distilled from CaH<sub>2</sub> immediately prior to use. All chemicals were used without further purification as commercially available unless otherwise noted. All reactions were performed under an atmosphere of dry nitrogen. Thin-layer chromatography (TLC) was performed on silica gel plates (60F-254) using UV-light (254 and 365 nm). Flash chromatography was conducted on silica gel (300–400 mesh). NMR (400 MHz for <sup>1</sup>H NMR, 100 MHz for <sup>13</sup>C NMR) spectra were recorded in CDCl<sub>3</sub> with TMS as the internal standard. Chemical shifts are reported in ppm and coupling constants are given in Hz. Data for <sup>1</sup>H NMR are recorded as follows: chemical shift (ppm), multiplicity (s, singlet; d, doublet; t, triplet; q, quarter; m, multiplet), coupling constant (Hz), integration. Data for <sup>13</sup>C NMR are reported in terms of chemical shift (δ, ppm). High resolution mass spectral (HRMS) analyses were measured using ESI techniques.

### General procedure for the asymmetric [1+4] annulation between Morita-Baylis-Hillman Carbonates **2** with 2-Enoylpyridines **1**

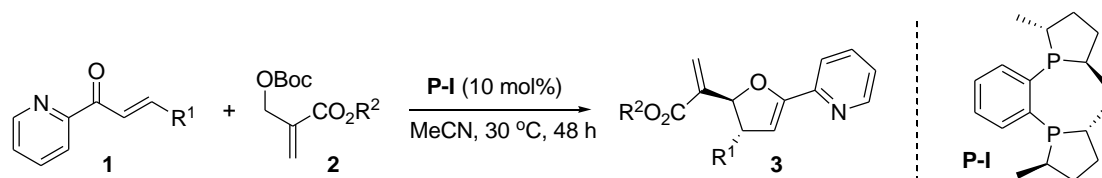

Under nitrogen atmosphere, a mixture of 2-enoylpyridines **1** (0.20 mmol), MBH carbonate **2** (0.24 mmol), **P-I** (0.02 mmol) in MeCN (1.0 mL) was stirred at 30 °C in a sealed tube for 48 h. After removal of the solvent, the crude residue was purified by column chromatography (petroleum ether/ethyl acetate) on silica gel to give the corresponding products **3**.

## Compounds characterization

### methyl 2-((2S,3R)-2,3-dihydro-3-phenyl-5-(pyridin-2-yl)furan-2-yl)acrylate (**3aa**)

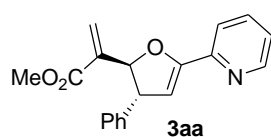

$^1\text{H}$  NMR (400 Hz,  $\text{CDCl}_3$ ):  $\delta$  (ppm) 8.65-8.63 (m, 1H), 7.77-7.73 (m, 1H), 7.68 (d,  $J = 8.0$  Hz, 1H), 7.36-7.31 (m, 4H), 7.28-7.23 (m, 2H), 6.34 (s, 1H), 5.91-5.90 (m, 2H), 5.39-5.37 (m, 1H), 4.10-4.08 (m, 1H), 3.76 (s, 3H).  $^{13}\text{C}$  NMR (100 Hz,  $\text{CDCl}_3$ ):  $\delta$  (ppm) 166.1, 155.5, 149.8, 143.4, 139.6, 136.8, 128.7, 127.8, 127.2, 124.7, 123.4, 120.3, 103.1, 87.1, 56.1, 52.0. HRMS: exact mass calculated for  $[\text{M}+\text{H}]^+$  ( $\text{C}_{19}\text{H}_{18}\text{NO}_3$ ) requires  $m/z$  308.12812, found  $m/z$  308.12759; HPLC conditions: Daicel Chiralpak OD-H column, *n*-hexane/2-propanol = 90/10, flow rate = 1.0 mL/min,  $\lambda = 254$  nm, retention time:  $t_R$  (minor) = 7.286 min,  $t_R$  (major) = 12.655 min, 95% ee.

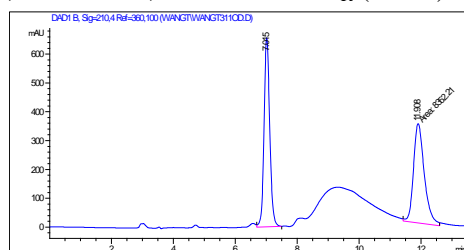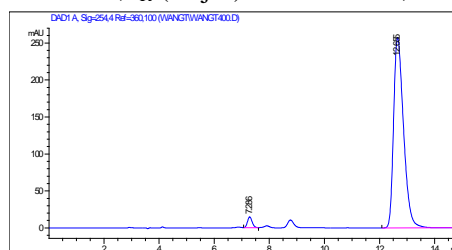

Racemic

Chiral

| # | Time   | Area   | Height | Width  | Area%  | Symmetry | # | Time   | Area   | Height | Width  | Area%  | Symmetry |
|---|--------|--------|--------|--------|--------|----------|---|--------|--------|--------|--------|--------|----------|
| 1 | 7.015  | 8345.5 | 655.9  | 0.1944 | 49.980 | 0.846    | 1 | 7.286  | 171.9  | 14.7   | 0.1825 | 2.596  | 0.846    |
| 2 | 11.908 | 8352.2 | 344.3  | 0.4043 | 50.020 | 0.729    | 2 | 12.655 | 6450.8 | 257.3  | 0.3865 | 97.404 | 0.625    |

### ethyl 2-((2S,3R)-2,3-dihydro-3-phenyl-5-(pyridin-2-yl)furan-2-yl)acrylate (**3ab**)

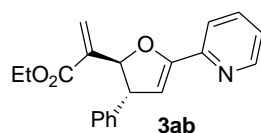

$^1\text{H}$  NMR (400 Hz,  $\text{CDCl}_3$ ):  $\delta$  (ppm) 8.63-8.62 (m, 1H), 7.75-7.71 (m, 1H), 7.66 (d,  $J = 8.0$  Hz, 1H), 7.36-7.22 (m, 6H), 6.33 (s, 1H), 5.91-5.87 (m, 2H), 5.41-5.39 (m, 1H), 4.21 (q,  $J = 7.2$  Hz, 2H), 4.10-4.08 (m, 1H), 1.21 (t,  $J = 7.2$  Hz, 3H).  $^{13}\text{C}$  NMR (100 Hz,  $\text{CDCl}_3$ ):  $\delta$  (ppm) 165.6, 155.4, 149.7, 143.4, 139.9, 136.7, 128.6, 127.7, 127.1, 124.4, 123.3, 120.2, 103.2, 87.1, 60.9, 56.1, 14.2. HRMS: exact mass calculated for  $[\text{M}+\text{H}]^+$  ( $\text{C}_{20}\text{H}_{20}\text{NO}_3$ ) requires  $m/z$  322.14377, found  $m/z$  322.14325; HPLC conditions: Daicel Chiralpak OD-H column, *n*-hexane/2-propanol = 90/10, flow rate = 1.0 mL/min,  $\lambda = 210$  nm, retention time:  $t_R$  (minor) = 6.096 min,  $t_R$  (major) = 8.925 min, 94% ee.

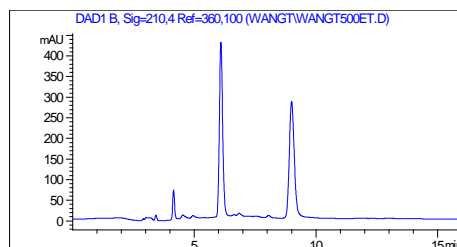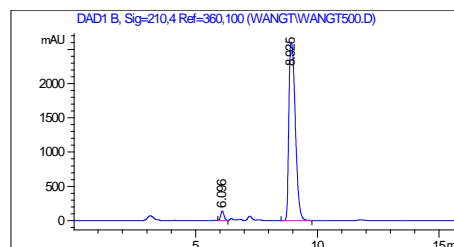

Racemic

Chiral

| # | Time  | Area   | Height | Width  | Area%  | Symmetry | # | Time  | Area    | Height | Width  | Area%  | Symmetry |
|---|-------|--------|--------|--------|--------|----------|---|-------|---------|--------|--------|--------|----------|
| 1 | 6.095 | 4058.8 | 425    | 0.1454 | 49.337 | 0.826    | 1 | 6.096 | 1351    | 142.1  | 0.1469 | 2.740  | 0.858    |
| 2 | 8.999 | 4167.9 | 283.4  | 0.2256 | 50.663 | 0.771    | 2 | 8.925 | 47958.2 | 2606.5 | 0.2907 | 97.260 | 0.541    |

**benzyl 2-((2S,3R)-2,3-dihydro-3-phenyl-5-(pyridin-2-yl)furan-2-yl)acrylate (3ac)**

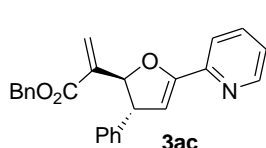

$^1\text{H NMR}$  (400 Hz,  $\text{CDCl}_3$ ):  $\delta$  (ppm) 8.64-8.63 (m, 1H), 7.76-7.71 (m, 1H), 7.65 (d,  $J = 7.6$  Hz, 1H), 7.33-7.22 (m, 11H), 6.39 (s, 1H), 5.91-5.90 (m, 2H), 5.43-5.42 (m, 1H), 5.23 (s, 2H), 4.12-4.10 (m, 1H).

$^{13}\text{C NMR}$  (100 Hz,  $\text{CDCl}_3$ ):  $\delta$  (ppm) 165.4, 155.4, 149.8, 149.3, 143.2,

139.6, 136.7, 135.7, 128.7, 128.6, 128.4, 127.7, 127.1, 125.2, 123.4, 120.2, 103.2, 87.1, 66.7, 56.0. HRMS: exact mass calculated for  $[\text{M}+\text{H}]^+$  ( $\text{C}_{25}\text{H}_{22}\text{NO}_3$ ) requires  $m/z$  384.15942, found  $m/z$  384.15915; HPLC conditions: Daicel Chiralpak OD-H column, *n*-hexane/2-propanol = 90/10, flow rate = 1.0 mL/min,  $\lambda = 210$  nm, retention time:  $t_R$  (minor) = 9.313 min,  $t_R$  (major) = 12.32 min, 94% ee.

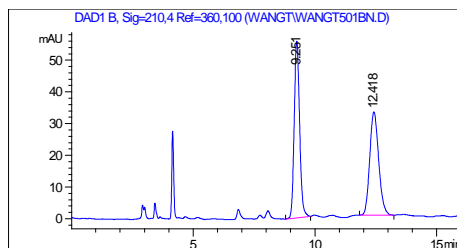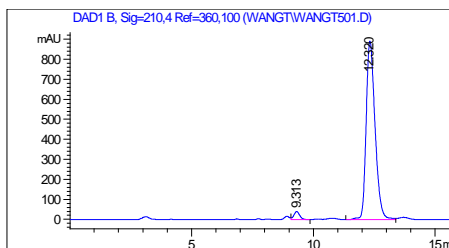

Racemic

Chiral

| # | Time   | Area  | Height | Width  | Area%  | Symmetry | # | Time  | Area    | Height | Width  | Area%  | Symmetry |
|---|--------|-------|--------|--------|--------|----------|---|-------|---------|--------|--------|--------|----------|
| 1 | 9.251  | 858.3 | 55.7   | 0.2377 | 50.826 | 0.856    | 1 | 9.313 | 665.4   | 40.1   | 0.2555 | 2.850  | 0.904    |
| 2 | 12.418 | 830.4 | 32.6   | 0.3956 | 49.174 | 0.834    | 2 | 12.32 | 22682.7 | 892.7  | 0.3904 | 97.150 | 0.695    |

**methyl 2-((2S,3R)-3-(2-bromophenyl)-2,3-dihydro-5-(pyridin-2-yl)furan-2-yl)acrylate (3ba)**

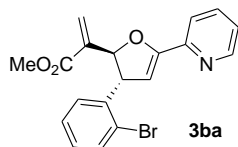

$^1\text{H NMR}$  (400 Hz,  $\text{CDCl}_3$ ):  $\delta$  (ppm) 8.62 (d,  $J = 4.4$  Hz, 1H), 7.75-7.71 (m, 1H), 7.65 (d,  $J = 8.0$  Hz, 1H), 7.55-7.53 (m, 1H), 7.48-7.46 (m, 1H), 7.32-7.23 (m, 2H), 7.11-7.07 (m, 1H), 6.38 (s, 1H), 5.96 (s, 1H), 5.86 (d,  $J = 2.8$  Hz, 1H), 5.46 (d,  $J = 5.6$  Hz, 1H), 4.70 (q,  $J = 2.8$  Hz, 1H), 3.71 (s, 3H).

$^{13}\text{C NMR}$  (100 Hz,  $\text{CDCl}_3$ ):  $\delta$  (ppm) 165.9, 155.6, 149.8, 149.2, 142.8, 139.7, 136.7, 132.7, 129.4, 128.6, 128.3, 125.0, 123.7, 123.5, 120.3, 103.2, 86.7, 54.9, 52.1. HRMS: exact mass calculated for  $[\text{M}+\text{Na}]^+$  ( $\text{C}_{19}\text{H}_{16}\text{NO}_3\text{BrNa}$ ) requires  $m/z$  408.02058, found  $m/z$  408.02008; HPLC conditions: Daicel Chiralpak OD-H column, *n*-hexane/2-propanol = 90/10, flow rate = 1.0 mL/min,  $\lambda = 254$  nm, retention time:  $t_R$  (minor) = 7.831 min,  $t_R$  (major) = 9.462 min, 91% ee.

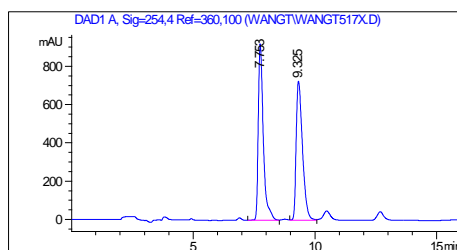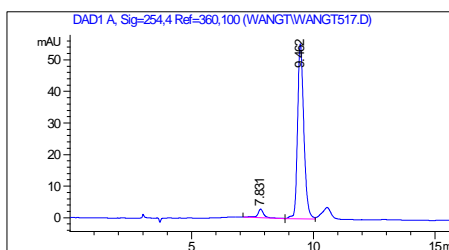

Racemic

Chiral

| # | Time  | Area    | Height | Width  | Area%  | Symmetry | # | Time  | Area  | Height | Width  | Area%  | Symmetry |
|---|-------|---------|--------|--------|--------|----------|---|-------|-------|--------|--------|--------|----------|
| 1 | 7.753 | 13231   | 921.3  | 0.2195 | 50.305 | 0.578    | 1 | 7.831 | 45.3  | 2.7    | 0.248  | 4.383  | 0.91     |
| 2 | 9.325 | 13070.5 | 725.8  | 0.2781 | 49.695 | 0.55     | 2 | 9.462 | 989.1 | 55.4   | 0.2722 | 95.617 | 0.756    |

**methyl 2-((2S,3R)-2,3-dihydro-3-(2-methoxyphenyl)-5-(pyridin-2-yl)furan-2-yl)acrylate**

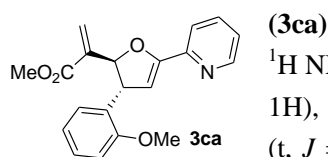

$^1\text{H NMR}$  (400 Hz,  $\text{CDCl}_3$ ):  $\delta$  (ppm) 8.62 (d,  $J = 4.4$  Hz, 1H), 7.74-7.69 (m, 1H), 7.63 (d,  $J = 7.6$  Hz, 1H), 7.38-7.35 (m, 1H), 7.26-7.20 (m, 2H), 6.94 (t,  $J = 7.2$  Hz, 1H), 6.86 (d,  $J = 8.0$  Hz, 1H), 6.33 (s, 1H), 5.94 (s, 1H), 5.85 (d,  $J = 3.2$  Hz, 1H), 5.40 (d,  $J = 6.4$  Hz, 1H), 4.62 (q,  $J = 3.2$  Hz, 1H), 3.78 (s, 3H), 3.69 (s, 3H).  $^{13}\text{C NMR}$  (100 Hz,  $\text{CDCl}_3$ ):  $\delta$  (ppm) 166.3, 156.7, 155.2, 149.7, 149.6, 140.7, 136.7, 131.7, 128.4, 128.0, 124.6, 123.2, 121.1, 120.2, 110.4, 103.2, 86.5, 55.4, 51.8, 48.9. HRMS: exact mass calculated for  $[\text{M}+\text{H}]^+$  ( $\text{C}_{20}\text{H}_{20}\text{NO}_4$ ) requires  $m/z$  338.13868, found  $m/z$  338.13834; HPLC conditions: Daicel Chiralpak OD-H column, *n*-hexane/2-propanol = 90/10, flow rate = 1.0 mL/min,  $\lambda = 210$  nm, retention time:  $t_R$  (major) = 8.158 min,  $t_R$  (minor) = 10.31 min, 94% ee.

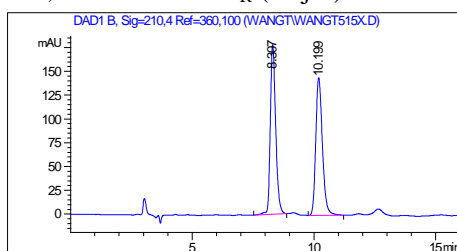

Racemic

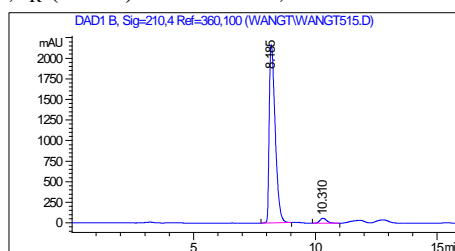

Chiral

| # | Time   | Area   | Height | Width  | Area%  | Symmetry | # | Time  | Area    | Height | Width  | Area%  | Symmetry |
|---|--------|--------|--------|--------|--------|----------|---|-------|---------|--------|--------|--------|----------|
| 1 | 8.307  | 2733.4 | 178.3  | 0.2349 | 49.979 | 0.746    | 1 | 8.185 | 36697.8 | 2165.8 | 0.2617 | 96.993 | 0.469    |
| 2 | 10.199 | 2735.8 | 144.8  | 0.2924 | 50.021 | 0.754    | 2 | 10.31 | 1137.7  | 59.6   | 0.2947 | 3.007  | 0.799    |

**(4R,5S)-tert-butyl 5-(1-(methoxycarbonyl)vinyl)-4,5-dihydro-4-phenylfuran-2-carboxylate**

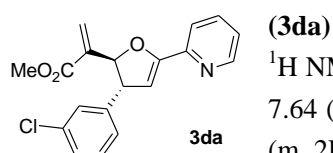

$^1\text{H NMR}$  (400 Hz,  $\text{CDCl}_3$ ):  $\delta$  (ppm) 8.62-8.61 (m, 1H), 7.75-7.71 (m, 1H), 7.64 (d,  $J = 7.6$  Hz, 1H), 7.48-7.45 (m, 1H), 7.36-7.34 (m, 1H), 7.27-7.23 (m, 2H), 7.19-7.15 (m, 1H), 6.37 (s, 1H), 5.95 (s, 1H), 5.85 (d,  $J = 3.2$  Hz, 1H), 5.45 (d,  $J = 5.6$  Hz, 1H), 4.71-4.68 (m, 1H), 3.70 (s, 3H).  $^{13}\text{C NMR}$  (100 Hz,  $\text{CDCl}_3$ ):  $\delta$  (ppm) 165.9, 155.6, 149.8, 149.2, 141.0, 139.8, 136.7, 133.1, 129.4, 129.3, 128.2, 127.6, 124.9, 123.5, 120.3, 102.9, 86.6, 52.1. HRMS: exact mass calculated for  $[\text{M}+\text{H}]^+$  ( $\text{C}_{19}\text{H}_{17}\text{ClNO}_3$ ) requires  $m/z$  342.08915, found  $m/z$  342.08887; HPLC conditions: Daicel Chiralpak OD-H column, *n*-hexane/2-propanol = 90/10, flow rate = 1.0 mL/min,  $\lambda = 254$  nm, retention time:  $t_R$  (minor) = 7.047 min,  $t_R$  (major) = 9.58 min, 91% ee.

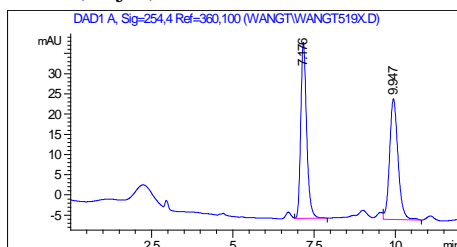

Racemic

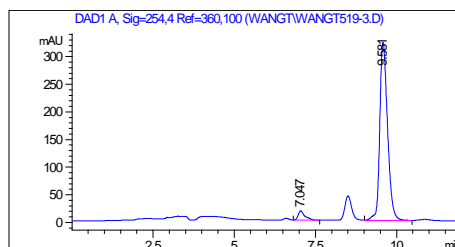

Chiral

| # | Time  | Area  | Height | Width  | Area%  | Symmetry | # | Time  | Area   | Height | Width  | Area%  | Symmetry |
|---|-------|-------|--------|--------|--------|----------|---|-------|--------|--------|--------|--------|----------|
| 1 | 7.176 | 548.6 | 43.6   | 0.1949 | 50.470 | 0.755    | 1 | 7.047 | 241.6  | 16.7   | 0.2111 | 4.326  | 0.557    |
| 2 | 9.947 | 538.3 | 29.9   | 0.2743 | 49.530 | 0.794    | 2 | 9.58  | 5343.8 | 322.1  | 0.2536 | 95.674 | 0.692    |

**methyl 2-((2S,3R)-3-(3-bromophenyl)-2,3-dihydro-5-(pyridin-2-yl)furan-2-yl)acrylate (3ea)**

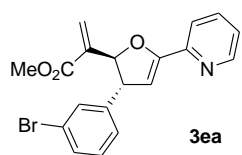

$^1\text{H NMR}$  (400 Hz,  $\text{CDCl}_3$ ):  $\delta$  (ppm) 8.64 (d,  $J = 4.8$  Hz, 1H), 7.77-7.73 (m, 1H), 7.67 (d,  $J = 8.0$  Hz, 1H), 7.49 (s, 1H), 7.39 (d,  $J = 8.0$  Hz, 1H), 7.29-7.25 (m, 2H), 7.20 (t,  $J = 7.8$  Hz, 1H), 6.34 (s, 1H), 5.90-5.87 (m, 2H), 5.35 (d,  $J = 4.8$  Hz, 1H), 4.05-4.03 (m, 1H), 3.77 (s, 3H).  $^{13}\text{C NMR}$  (100

Hz,  $\text{CDCl}_3$ ):  $\delta$  (ppm) 165.9, 156.0, 149.8, 149.0, 145.8, 139.3, 136.8, 130.8, 130.2, 126.5, 124.9, 123.6, 122.8, 120.3, 102.3, 86.9, 55.7, 52.0. HRMS: exact mass calculated for  $[\text{M}+\text{H}]^+$  ( $\text{C}_{19}\text{H}_{17}\text{BrNO}_3$ ) requires  $m/z$  386.03863, found  $m/z$  386.03827; HPLC conditions: Daicel Chiralpak OD-H column,  $n$ -hexane/2-propanol = 90/10, flow rate = 1.0 mL/min,  $\lambda = 254$  nm, retention time:  $t_R$  (minor) = 7.939 min,  $t_R$  (major) = 8.481 min, 92% ee.

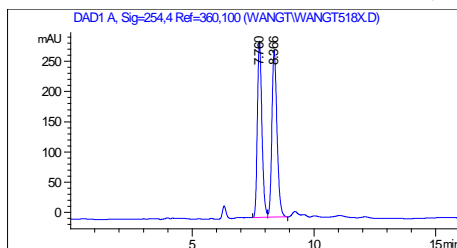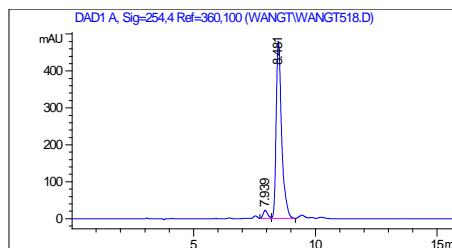

Racemic

Chiral

| # | Time  | Area   | Height | Width  | Area%  | Symmetry | # | Time  | Area   | Height | Width  | Area%  | Symmetry |
|---|-------|--------|--------|--------|--------|----------|---|-------|--------|--------|--------|--------|----------|
| 1 | 7.76  | 3776.6 | 292    | 0.1989 | 48.298 | 0.774    | 1 | 7.939 | 289.4  | 21.8   | 0.2026 | 3.726  | 0.773    |
| 2 | 8.366 | 4042.9 | 274.9  | 0.2276 | 51.702 | 0.759    | 2 | 8.481 | 7476.5 | 480.3  | 0.2376 | 96.274 | 0.621    |

**methyl 2-((2S,3R)-2,3-dihydro-3-(3-methoxyphenyl)-5-(pyridin-2-yl)furan-2-yl)acrylate (3fa)**

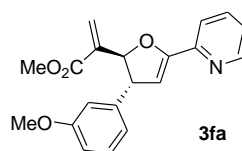

$^1\text{H NMR}$  (400 Hz,  $\text{CDCl}_3$ ):  $\delta$  (ppm) 8.63 (d,  $J = 4.8$  Hz, 1H), 7.76-7.71 (m, 1H), 7.66 (d,  $J = 7.6$  Hz, 1H), 7.27-7.23 (m, 2H), 6.94-6.89 (m, 2H), 6.81-6.79 (m, 1H), 6.33 (s, 1H), 5.89-5.88 (m, 2H), 5.38 (d,  $J = 5.2$  Hz, 1H), 4.08-4.06 (m, 1H), 3.79 (s, 3H), 3.76 (s, 3H).  $^{13}\text{C NMR}$  (100 Hz,  $\text{CDCl}_3$ ):  $\delta$  (ppm) 166.0, 160.0, 155.6, 149.8, 145.1, 139.6, 136.7, 129.7, 124.8, 123.4, 120.3, 120.2, 113.6, 112.4, 103.0, 87.1, 56.1, 55.4, 51.9. HRMS: exact mass calculated for  $[\text{M}+\text{H}]^+$  ( $\text{C}_{20}\text{H}_{20}\text{NO}_4$ ) requires  $m/z$  338.13868, found  $m/z$  338.13831; HPLC conditions: Daicel Chiralpak OD-H column,  $n$ -hexane/2-propanol = 90/10, flow rate = 1.0 mL/min,  $\lambda = 210$  nm, retention time:  $t_R$  (minor) = 12.187 min,  $t_R$  (major) = 25.071 min, 94% ee.

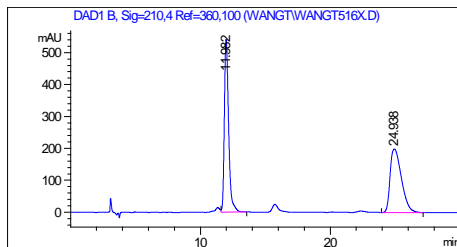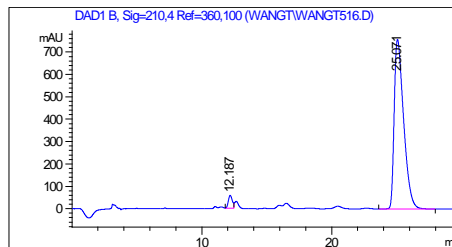

Racemic

Chiral

| # | Time   | Area    | Height | Width  | Area%  | Symmetry | # | Time   | Area    | Height | Width  | Area%  | Symmetry |
|---|--------|---------|--------|--------|--------|----------|---|--------|---------|--------|--------|--------|----------|
| 1 | 11.982 | 12370   | 541.7  | 0.3504 | 50.744 | 0.658    | 1 | 12.187 | 1215.8  | 57.7   | 0.3257 | 3.085  | 0.818    |
| 2 | 24.938 | 12007.4 | 199.2  | 0.9453 | 49.256 | 0.57     | 2 | 25.071 | 38193.6 | 758.9  | 0.7712 | 96.915 | 0.502    |

**methyl 2-((2S,3R)-3-(4-fluorophenyl)-2,3-dihydro-5-(pyridin-2-yl)furan-2-yl)acrylate (3ga)**

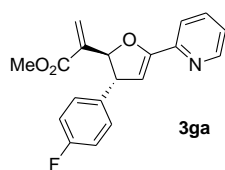

$^1\text{H}$  NMR (400 Hz,  $\text{CDCl}_3$ ):  $\delta$  (ppm) 8.63-8.61(m, 1H), 7.75-7.71 (m, 1H), 7.67-7.65 (m, 1H), 7.32-7.27 (m, 2H), 7.26-7.23 (m, 1H), 7.03-6.97 (m, 2H), 6.32 (s, 1H), 5.89-5.87 (m, 2H), 5.32-5.30 (m, 1H), 4.06-4.04 (m, 1H), 3.75 (s, 3H).  $^{13}\text{C}$  NMR (100 Hz,  $\text{CDCl}_3$ ):  $\delta$  (ppm) 166.0, 163.3, 160.8, 155.6, 149.8, 149.1, 139.4, 139.1, 136.8, 129.3, 129.2, 124.6, 123.5, 120.2, 115.5, 115.3, 102.8, 87.1, 55.3, 51.9.  $^{19}\text{F}$  NMR:  $\delta$  (ppm) -116.1. HRMS: exact mass calculated for  $[\text{M}+\text{H}]^+$  ( $\text{C}_{19}\text{H}_{17}\text{FNO}_3$ ) requires  $m/z$  326.11870, found  $m/z$  326.11786; HPLC conditions: Daicel Chiralpak OD-H column, *n*-hexane/2-propanol = 95/5, flow rate = 0.5 mL/min,  $\lambda$  = 254 nm, retention time:  $t_R$  (major) = 16.445 min,  $t_R$  (minor) = 17.332 min, 93% ee.

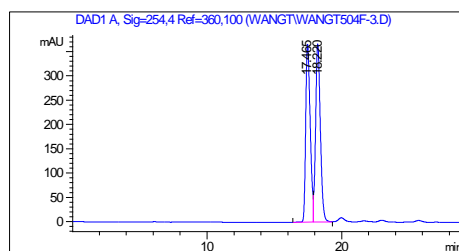

Racemic

| # | Time   | Area   | Height | Width  | Area%  | Symmetry |
|---|--------|--------|--------|--------|--------|----------|
| 1 | 17.465 | 8516.5 | 366.1  | 0.3594 | 48.651 | 0.665    |
| 2 | 18.22  | 8989   | 366.6  | 0.3781 | 51.349 | 0.757    |

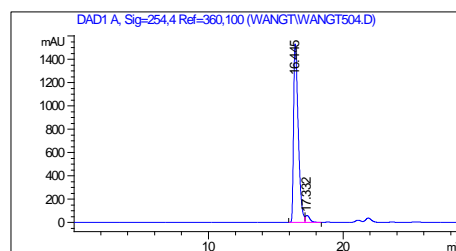

Chiral

| # | Time   | Area    | Height | Width  | Area%  | Symmetry |
|---|--------|---------|--------|--------|--------|----------|
| 1 | 16.445 | 36769.6 | 1533   | 0.3678 | 96.390 | 0.504    |
| 2 | 17.332 | 1376.9  | 59.6   | 0.3434 | 3.610  | 0.612    |

**methyl 2-((2S,3R)-3-(4-chlorophenyl)-2,3-dihydro-5-(pyridin-2-yl)furan-2-yl)acrylate (3ha)**

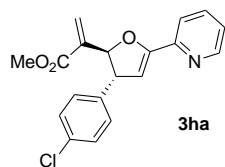

$^1\text{H}$  NMR (400 Hz,  $\text{CDCl}_3$ ):  $\delta$  (ppm) 8.63-8.61(m, 1H), 7.76-7.71 (m, 1H), 7.67-7.65 (m, 1H), 7.30-7.23 (m, 5H), 6.32 (s, 1H), 5.88-5.86 (m, 2H), 5.31-5.30 (m, 1H), 4.05-4.03 (m, 1H), 3.75 (s, 3H).  $^{13}\text{C}$  NMR (100 Hz,  $\text{CDCl}_3$ ):  $\delta$  (ppm) 165.9, 155.8, 149.8, 149.0, 141.9, 139.3, 136.8, 132.8, 129.1, 128.8, 124.7, 123.5, 120.3, 102.5, 86.9, 55.4, 52.0. HRMS: exact mass calculated for  $[\text{M}+\text{H}]^+$  ( $\text{C}_{19}\text{H}_{17}\text{ClNO}_3$ ) requires  $m/z$  342.08915, found  $m/z$  342.08859; HPLC conditions: Daicel Chiralpak OD-H column, *n*-hexane/2-propanol = 90/10, flow rate = 1.0 mL/min,  $\lambda$  = 210 nm, retention time:  $t_R$  (major) = 6.333 min,  $t_R$  (minor) = 7.283 min, 96% ee.

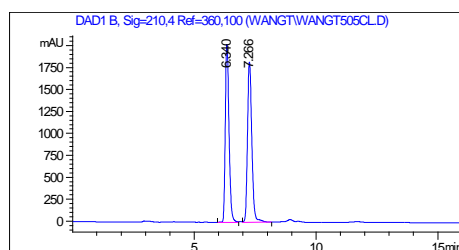

Racemic

| # | Time  | Area    | Height | Width  | Area%  | Symmetry |
|---|-------|---------|--------|--------|--------|----------|
| 1 | 6.34  | 21637.3 | 2029.2 | 0.1664 | 48.921 | 0.705    |
| 2 | 7.266 | 22592   | 1826.3 | 0.1923 | 51.079 | 0.753    |

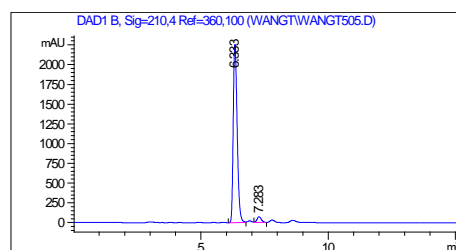

Chiral

| # | Time  | Area    | Height | Width  | Area%  | Symmetry |
|---|-------|---------|--------|--------|--------|----------|
| 1 | 6.333 | 24684.6 | 2259   | 0.1715 | 96.554 | 0.695    |
| 2 | 7.283 | 881.1   | 74.4   | 0.1822 | 3.446  | 0.896    |

**methyl 2-((2S,3R)-3-(4-bromophenyl)-2,3-dihydro-5-(pyridin-2-yl)furan-2-yl)acrylate (3ia)**

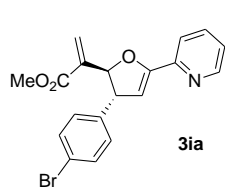

$^1\text{H}$  NMR (400 Hz,  $\text{CDCl}_3$ ):  $\delta$  (ppm) 8.64-8.62(m, 1H), 7.76-7.72 (m, 1H), 7.67-7.65 (m, 1H), 7.46-7.42 (m, 2H), 7.27-7.20 (m, 3H), 6.33 (s, 1H), 5.89 (t,  $J = 1.2$  Hz, 1H), 5.86 (d,  $J = 3.2$  Hz, 1H), 5.32-5.30 (m, 1H), 4.04-4.02 (m, 1H), 3.76 (s, 3H).  $^{13}\text{C}$  NMR (100 Hz,  $\text{CDCl}_3$ ):  $\delta$  (ppm) 165.9, 155.9, 149.8, 149.0, 142.4, 139.3, 136.8, 131.7, 129.5, 124.7, 123.6, 121.0, 120.3,

102.4, 86.9, 55.5, 52.0. HRMS: exact mass calculated for  $[\text{M}+\text{H}]^+$  ( $\text{C}_{19}\text{H}_{17}\text{BrNO}_3$ ) requires  $m/z$  386.03863, found  $m/z$  386.03787; HPLC conditions: Daicel Chiralpak OD-H column, *n*-hexane/2-propanol = 90/10, flow rate = 1.0 mL/min,  $\lambda = 210$  nm, retention time:  $t_R$  (major) = 6.52 min,  $t_R$  (minor) = 7.682 min, 92% ee.

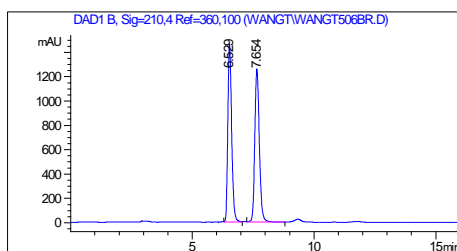

Racemic

| # | Time  | Area    | Height | Width  | Area%  | Symmetry |
|---|-------|---------|--------|--------|--------|----------|
| 1 | 6.529 | 16090.3 | 1464.9 | 0.1701 | 49.304 | 0.717    |
| 2 | 7.654 | 16544.7 | 1259.4 | 0.2013 | 50.696 | 0.792    |

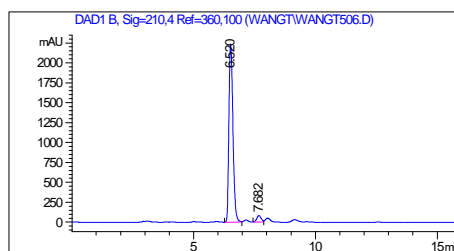

Chiral

| # | Time  | Area    | Height | Width  | Area%  | Symmetry |
|---|-------|---------|--------|--------|--------|----------|
| 1 | 6.52  | 25718.4 | 2239.1 | 0.18   | 96.202 | 0.69     |
| 2 | 7.682 | 1015.3  | 80.5   | 0.1971 | 3.798  | 0.862    |

**methyl 2-((2S,3R)-3-(4-(trifluoromethyl)phenyl)-2,3-dihydro-5-(pyridin-2-yl)furan-2-yl)acrylate (3ja)**

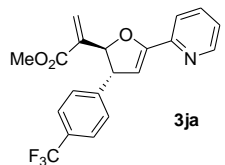

$^1\text{H}$  NMR (400 Hz,  $\text{CDCl}_3$ ):  $\delta$  (ppm) 8.65-8.64 (m, 1H), 7.78-7.74 (m, 1H), 7.70-7.68 (m, 1H), 7.60-7.58 (m, 2H), 7.49-7.47 (m, 2H), 7.29-7.26 (m, 1H), 6.36 (s, 1H), 5.93-5.90 (m, 2H), 5.38-5.36 (m, 1H), 4.14-4.12 (m, 1H), 3.77 (s, 3H).  $^{13}\text{C}$  NMR (100 Hz,  $\text{CDCl}_3$ ):  $\delta$  (ppm) 163.9, 154.1, 147.9, 147.0,

145.5, 137.2, 134.8, 126.2, 123.7, 123.6, 122.9, 121.7, 118.3, 100.2, 84.8, 53.9, 50.0, 23.5.  $^{19}\text{F}$  NMR:  $\delta$  (ppm) -62.4. HRMS: exact mass calculated for  $[\text{M}+\text{H}]^+$  ( $\text{C}_{20}\text{H}_{17}\text{F}_3\text{NO}_3$ ) requires  $m/z$  376.11550, found  $m/z$  376.11533; HPLC conditions: Daicel Chiralpak OD-H column, *n*-hexane/2-propanol = 90/10, flow rate = 1.0 mL/min,  $\lambda = 254$  nm, retention time:  $t_R$  (major) = 5.623 min,  $t_R$  (minor) = 6.847 min, 91% ee.

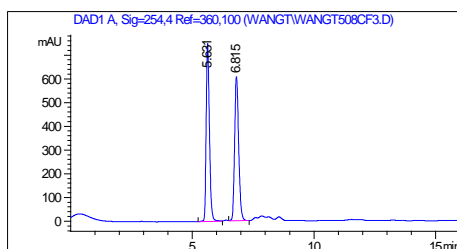

Racemic

| # | Time  | Area   | Height | Width  | Area%  | Symmetry |
|---|-------|--------|--------|--------|--------|----------|
| 1 | 5.631 | 6957   | 750.5  | 0.1441 | 49.751 | 0.725    |
| 2 | 6.815 | 7026.6 | 607.7  | 0.1789 | 50.249 | 0.779    |

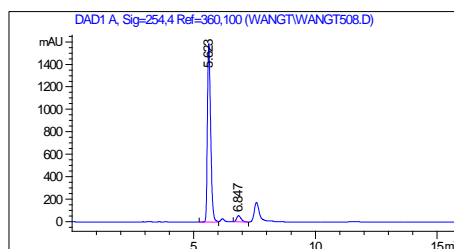

Chiral

| # | Time  | Area    | Height | Width  | Area%  | Symmetry |
|---|-------|---------|--------|--------|--------|----------|
| 1 | 5.623 | 14766.4 | 1589.1 | 0.1424 | 95.540 | 0.682    |
| 2 | 6.847 | 689.3   | 55     | 0.1942 | 4.460  | 0.731    |



**methyl 2-((2S,3R)-2,3-dihydro-3-(4-nitrophenyl)-5-(pyridin-2-yl)furan-2-yl)acrylate (3ka)**

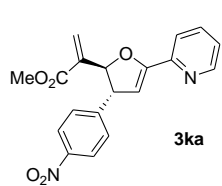

$^1\text{H}$  NMR (400 Hz,  $\text{CDCl}_3$ ):  $\delta$  (ppm) 8.64-8.63 (m, 1H), 8.21-8.17 (m, 2H), 7.79-7.74 (m, 1H), 7.68 (d,  $J = 8.0$  Hz, 1H), 7.53-7.51 (m, 2H), 7.30-7.26 (m, 1H), 6.35 (s, 1H), 5.93 (s, 1H), 5.89 (d,  $J = 3.2$  Hz, 1H), 5.35-5.34 (m, 1H), 4.17-4.15 (m, 1H), 3.77 (s, 3H).  $^{13}\text{C}$  NMR (100 Hz,  $\text{CDCl}_3$ ):  $\delta$  (ppm) 165.9, 156.5, 150.9, 149.9, 148.7, 147.2, 138.9, 136.9, 128.7, 125.0, 124.0, 123.8,

120.4, 101.7, 86.5, 55.8, 52.1. HRMS: exact mass calculated for  $[\text{M}+\text{H}]^+$  ( $\text{C}_{19}\text{H}_{17}\text{N}_2\text{O}_5$ ) requires  $m/z$  353.11320, found  $m/z$  353.11298; HPLC conditions: Daicel Chiralpak OD-H column, *n*-hexane/2-propanol = 90/10, flow rate = 1.0 mL/min,  $\lambda = 254$  nm, retention time:  $t_R$  (major) = 16.497 min,  $t_R$  (minor) = 19.868 min, 91% ee.

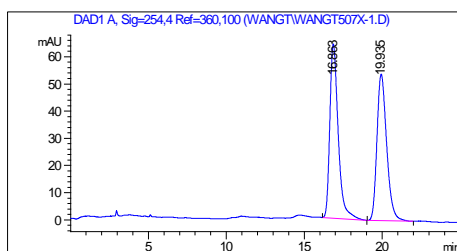

Racemic

| # | Time   | Area   | Height | Width  | Area%  | Symmetry |
|---|--------|--------|--------|--------|--------|----------|
| 1 | 16.863 | 2401.4 | 64.1   | 0.5649 | 50.754 | 0.65     |
| 2 | 19.935 | 2330.1 | 53.9   | 0.6524 | 49.246 | 0.725    |

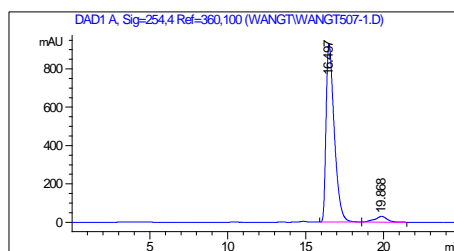

Chiral

| # | Time   | Area    | Height | Width  | Area%  | Symmetry |
|---|--------|---------|--------|--------|--------|----------|
| 1 | 16.497 | 33930.9 | 929.8  | 0.5537 | 95.487 | 0.515    |
| 2 | 19.868 | 1603.8  | 29.8   | 0.782  | 4.513  | 1.217    |

**methyl 2-((2S,3R)-2,3-dihydro-5-(pyridin-2-yl)-3-p-tolylfuran-2-yl)acrylate (3la)**

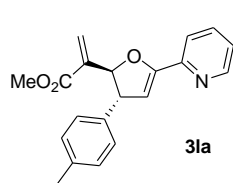

$^1\text{H}$  NMR (400 Hz,  $\text{CDCl}_3$ ):  $\delta$  (ppm) 8.64-8.62 (m, 1H), 7.75-7.71 (m, 1H), 7.67-7.65 (m, 1H), 7.26-7.22 (m, 3H), 7.15-7.13 (m, 2H), 6.33 (s, 1H), 5.89-5.88 (m, 2H), 5.35-5.33 (m, 1H), 4.07-4.05 (m, 1H), 3.76 (s, 3H), 2.33 (s, 3H).  $^{13}\text{C}$  NMR (100 Hz,  $\text{CDCl}_3$ ):  $\delta$  (ppm) 166.0, 155.3, 149.7, 149.3, 140.4, 139.6, 136.7, 129.4, 127.6, 124.6, 123.3, 120.2, 103.2, 87.2, 55.7,

51.9, 21.2. HRMS: exact mass calculated for  $[\text{M}+\text{H}]^+$  ( $\text{C}_{20}\text{H}_{20}\text{NO}_3$ ) requires  $m/z$  322.14377, found  $m/z$  322.14349; HPLC conditions: Daicel Chiralpak OD-H column, *n*-hexane/2-propanol = 90/10, flow rate = 1.0 mL/min,  $\lambda = 210$  nm, retention time:  $t_R$  (minor) = 6.525 min,  $t_R$  (major) = 10.908 min, 92% ee.

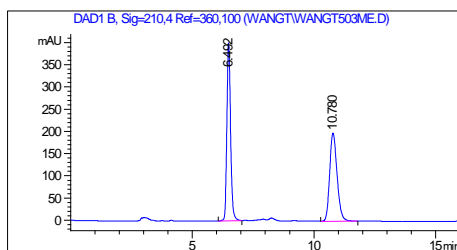

Racemic

| # | Time  | Area   | Height | Width  | Area%  | Symmetry |
|---|-------|--------|--------|--------|--------|----------|
| 1 | 6.492 | 4255.2 | 400.6  | 0.1639 | 50.419 | 0.811    |
| 2 | 10.78 | 4184.5 | 198.6  | 0.3259 | 49.581 | 0.768    |

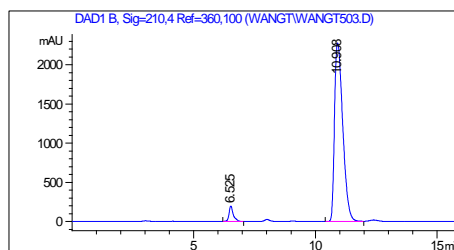

Chiral

| # | Time   | Area    | Height | Width  | Area%  | Symmetry |
|---|--------|---------|--------|--------|--------|----------|
| 1 | 6.525  | 2404.2  | 197    | 0.1824 | 4.288  | 0.678    |
| 2 | 10.908 | 53667.3 | 2280.1 | 0.3646 | 95.712 | 0.543    |

**methyl 2-((2S,3R)-2,3-dihydro-3-(naphthalen-2-yl)-5-(pyridin-2-yl)furan-2-yl)acrylate**

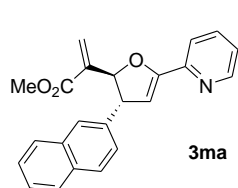

**(3ma)**

$^1\text{H}$  NMR (400 Hz,  $\text{CDCl}_3$ ):  $\delta$  (ppm) 8.63 (d,  $J = 4.4$  Hz, 1H), 8.06-8.03 (m, 1H), 7.89-7.86 (m, 1H), 7.78-7.72 (m, 2H), 7.67 (d,  $J = 7.6$  Hz, 1H), 7.60 (d,  $J = 6.4$  Hz, 1H), 7.51-7.44 (m, 3H), 7.25-7.23 (m, 1H), 6.42 (s, 1H), 6.00-5.99 (m, 2H), 5.58 (d,  $J = 6.0$  Hz, 1H), 5.00-4.98 (m, 1H), 3.50 (s, 3H).  $^{13}\text{C}$  NMR (100 Hz,  $\text{CDCl}_3$ ):  $\delta$  (ppm) 166.0, 155.2, 149.7, 149.3, 140.1, 139.3, 136.6, 133.9, 131.3, 128.9, 127.6, 126.0, 125.8, 125.5, 125.3, 123.3, 123.2, 120.2, 103.9, 86.8, 51.8, 51.5. HRMS: exact mass calculated for  $[\text{M}+\text{H}]^+$  ( $\text{C}_{23}\text{H}_{20}\text{NO}_3$ ) requires  $m/z$  358.14377, found  $m/z$  358.14334; HPLC conditions: Daicel Chiralpak OD-H column, n-hexane/2-propanol = 90/10, flow rate = 1.0 mL/min,  $\lambda = 254$  nm, retention time:  $t_R$  (major) = 9.844 min,  $t_R$  (minor) = 12.062 min, 83% ee.

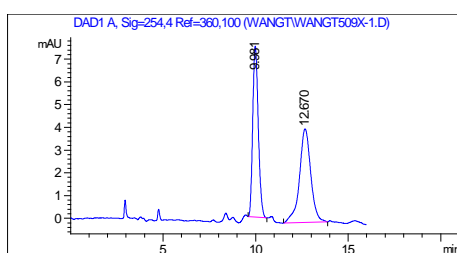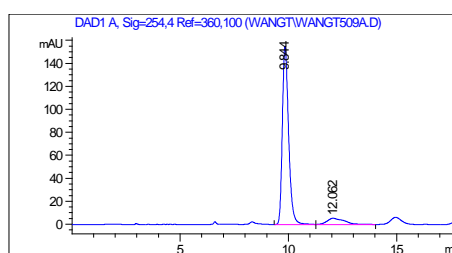

Racemic

Chiral

| # | Time  | Area  | Height | Width  | Area%  | Symmetry | # | Time   | Area   | Height | Width  | Area%  | Symmetry |
|---|-------|-------|--------|--------|--------|----------|---|--------|--------|--------|--------|--------|----------|
| 1 | 9.981 | 156.8 | 7.5    | 0.3231 | 47.251 | 0.792    | 1 | 9.844  | 3124.5 | 155.2  | 0.3089 | 91.356 | 0.699    |
| 2 | 12.67 | 175.1 | 4.1    | 0.6254 | 52.749 | 0.978    | 2 | 12.062 | 295.6  | 5.4    | 0.7263 | 8.644  | 0.502    |

**methyl 2-((2S,3S)-2,3-dihydro-5-(pyridin-2-yl)-3-(thiophen-2-yl)furan-2-yl)acrylate (3na)**

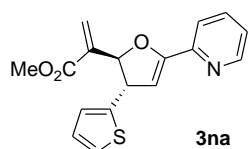

$^1\text{H}$  NMR (400 Hz,  $\text{CDCl}_3$ ):  $\delta$  (ppm) 8.57-8.56 (m, 1H), 7.68-7.58 (m, 2H), 7.19-7.12 (m, 2H), 6.93-6.88 (m, 2H), 6.27 (s, 1H), 5.90-5.80 (m, 2H), 5.34-5.33 (m, 1H), 4.33-4.31 (m, 1H), 3.74 (s, 3H).  $^{13}\text{C}$  NMR (100 Hz,  $\text{CDCl}_3$ ):  $\delta$  (ppm) 166.0, 155.9, 149.8, 149.1, 147.1, 139.0, 136.7, 127.0,

125.1, 124.5, 124.4, 123.6, 120.3, 102.0, 87.2, 52.0, 50.7. HRMS: exact mass calculated for  $[\text{M}+\text{H}]^+$  ( $\text{C}_{17}\text{H}_{16}\text{NO}_3\text{S}$ ) requires  $m/z$  314.08454, found  $m/z$  314.08408; HPLC conditions: Daicel Chiralpak OD-H column, n-hexane/2-propanol = 90/10, flow rate = 1.0 mL/min,  $\lambda = 254$  nm, retention time:  $t_R$  (minor) = 9.034 min,  $t_R$  (major) = 21.885 min, 94% ee.

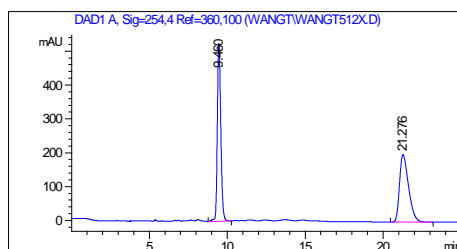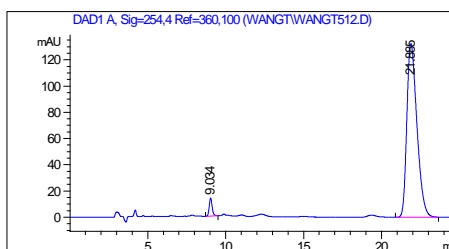

Racemic

Chiral

| # | Time   | Area   | Height | Width  | Area%  | Symmetry | # | Time   | Area   | Height | Width  | Area%  | Symmetry |
|---|--------|--------|--------|--------|--------|----------|---|--------|--------|--------|--------|--------|----------|
| 1 | 9.46   | 8170.8 | 525.2  | 0.2395 | 50.562 | 0.77     | 1 | 9.034  | 178.8  | 13.7   | 0.2007 | 2.923  | 0.833    |
| 2 | 21.276 | 7989.2 | 198.9  | 0.6187 | 49.438 | 0.605    | 2 | 21.885 | 5938.8 | 132.4  | 0.6954 | 97.077 | 0.63     |

**methyl 2-((2S,3R)-2,3-dihydro-3,5-di(pyridin-2-yl)furan-2-yl)acrylate (3oa)**

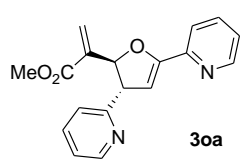

$^1\text{H}$  NMR (400 Hz,  $\text{CDCl}_3$ ):  $\delta$  (ppm) 8.58-8.57 (m, 2H), 7.73-7.62 (m, 3H), 7.31 (d,  $J = 8.0$  Hz, 1H), 7.23-7.20 (m, 1H), 7.17-7.13 (m, 1H), 6.35 (s, 1H), 5.97-5.91 (m, 2H), 5.76 (d,  $J = 5.6$  Hz, 1H), 4.29-4.27 (m, 1H), 3.68 (s, 3H).  $^{13}\text{C}$  NMR (100 Hz,  $\text{CDCl}_3$ ):  $\delta$  (ppm) 165.9, 162.3, 155.6, 149.65, 149.59, 149.2, 139.7, 136.8, 136.7, 124.9, 123.4, 122.3, 122.1, 120.4, 102.5, 85.2, 58.4, 51.9. HRMS: exact mass calculated for  $[\text{M}+\text{H}]^+$  ( $\text{C}_{18}\text{H}_{17}\text{N}_2\text{O}_3$ ) requires  $m/z$  309.12337, found  $m/z$  309.12314; HPLC conditions: Daicel Chiralpak OD-H column, n-hexane/2-propanol = 90/10, flow rate = 1.0 mL/min,  $\lambda = 254$  nm, retention time:  $t_R$  (minor) = 9.567 min,  $t_R$  (major) = 10.431 min, 94% ee.

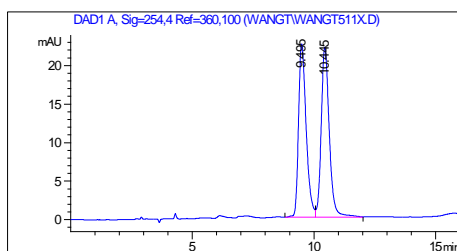

Racemic

| # | Time   | Area  | Height | Width  | Area%  | Symmetry |
|---|--------|-------|--------|--------|--------|----------|
| 1 | 9.495  | 489.1 | 22.5   | 0.3336 | 49.065 | 0.668    |
| 2 | 10.445 | 507.7 | 22.1   | 0.3505 | 50.935 | 0.75     |

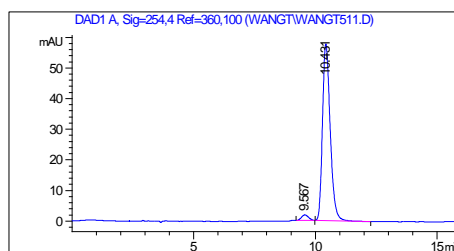

Chiral

| # | Time   | Area   | Height | Width  | Area%  | Symmetry |
|---|--------|--------|--------|--------|--------|----------|
| 1 | 9.567  | 37.2   | 1.8    | 0.3171 | 2.837  | 0.87     |
| 2 | 10.431 | 1273.2 | 57.8   | 0.3392 | 97.163 | 0.719    |

**methyl 2-((2S,3S)-2,3-dihydro-5-(pyridin-2-yl)-3-styrylfuran-2-yl)acrylate (3pa)**

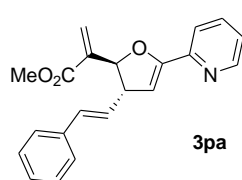

$^1\text{H}$  NMR (400 Hz,  $\text{CDCl}_3$ ):  $\delta$  (ppm) 8.64-8.62 (m, 1H), 7.75-7.71 (m, 1H), 7.63 (d,  $J = 7.6$  Hz, 1H), 7.40-7.38 (m, 2H), 7.30 (m, 2H), 7.26-7.19 (m, 2H), 6.51 (d,  $J = 16.0$  Hz, 1H), 6.42-6.37 (m, 1H), 6.33 (s, 1H), 5.90-5.89 (m, 1H), 5.82 (d,  $J = 2.8$  Hz, 1H), 5.33 (d,  $J = 5.6$  Hz, 1H), 3.80 (s, 3H), 3.75-3.71 (m, 1H).  $^{13}\text{C}$  NMR (100 Hz,  $\text{CDCl}_3$ ):  $\delta$  (ppm) 166.1, 155.3, 149.8, 139.5, 137.3, 136.7, 131.0, 130.8, 128.6, 127.5, 126.5, 124.7, 123.4, 120.2, 101.6, 84.9, 53.7, 52.0. HRMS: exact mass calculated for  $[\text{M}+\text{H}]^+$  ( $\text{C}_{21}\text{H}_{20}\text{NO}_3$ ) requires  $m/z$  334.14377, found  $m/z$  334.14337; HPLC conditions: Daicel Chiralpak OD-H column, n-hexane/2-propanol = 90/10, flow rate = 1.0 mL/min,  $\lambda = 254$  nm, retention time:  $t_R$  (major) = 11.116 min,  $t_R$  (minor) = 12.474 min, 92% ee.

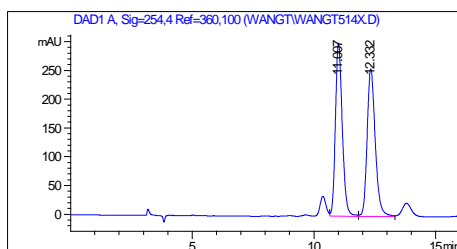

Racemic

| # | Time   | Area   | Height | Width  | Area%  | Symmetry |
|---|--------|--------|--------|--------|--------|----------|
| 1 | 11.007 | 5875.3 | 299.9  | 0.3025 | 49.805 | 0.761    |
| 2 | 12.332 | 5921.2 | 256.3  | 0.3555 | 50.195 | 0.761    |

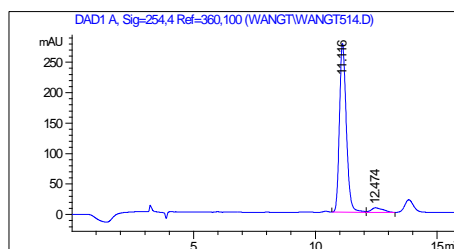

Chiral

| # | Time   | Area   | Height | Width  | Area%  | Symmetry |
|---|--------|--------|--------|--------|--------|----------|
| 1 | 11.116 | 5405.1 | 276.9  | 0.2998 | 95.710 | 0.755    |
| 2 | 12.474 | 242.3  | 7.4    | 0.4623 | 4.290  | 0.579    |

**methyl 2-((2S,3S)-2,3-dihydro-3-methyl-5-(pyridin-2-yl)furan-2-yl)acrylate (3qa)**

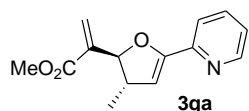

$^1\text{H NMR}$  (400 Hz,  $\text{CDCl}_3$ ):  $\delta$  (ppm) 8.59-8.58 (m, 1H), 7.72-7.68 (m, 1H), 7.58 (d,  $J = 8.0$  Hz, 1H), 7.22-7.19 (m, 1H), 6.26 (s, 1H), 5.84 (s, 1H), 5.76 (d,  $J = 3.2$  Hz, 1H), 5.09 (d,  $J = 4.8$  Hz, 1H), 3.80 (s, 3H), 2.99-2.92 (m, 1H), 1.33 (d,  $J = 6.8$  Hz, 3H).  $^{13}\text{C NMR}$  (100 Hz,  $\text{CDCl}_3$ ):  $\delta$  (ppm) 166.4, 154.0, 149.7, 149.6, 140.0, 136.7, 123.9, 123.1, 120.0, 104.9, 86.0, 52.0, 45.6, 21.2. HRMS: exact mass calculated for  $[\text{M}+\text{H}]^+$  ( $\text{C}_{14}\text{H}_{16}\text{NO}_3$ ) requires  $m/z$  246.11247, found  $m/z$  246.11223; HPLC conditions: Daicel Chiralpak OD-H column, n-hexane/2-propanol = 90/10, flow rate = 1.0 mL/min,  $\lambda = 210$  nm, retention time:  $t_R$  (major) = 4.812 min,  $t_R$  (minor) = 6.368 min, 92% ee.

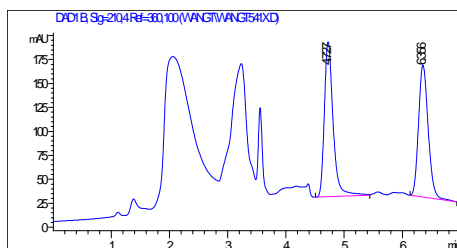

Racemic

| # | Time  | Area   | Height | Width  | Area%  | Symmetry |
|---|-------|--------|--------|--------|--------|----------|
| 1 | 4.727 | 1703.6 | 161.9  | 0.1607 | 51.817 | 0.669    |
| 2 | 6.356 | 1584.2 | 137.7  | 0.1782 | 48.183 | 0.793    |

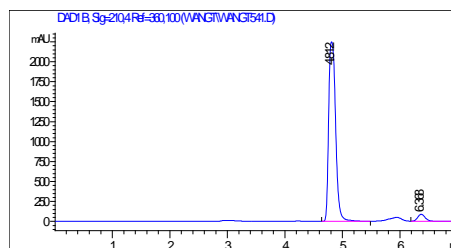

Chiral

| # | Time  | Area    | Height | Width  | Area%  | Symmetry |
|---|-------|---------|--------|--------|--------|----------|
| 1 | 4.812 | 18741.6 | 2251.8 | 0.1331 | 95.817 | 0.689    |
| 2 | 6.368 | 818.1   | 87.8   | 0.1427 | 4.183  | 0.813    |

**methyl 2-((2S,3R)-2,3-dihydro-3-phenyl-5-(pyridin-3-yl)furan-2-yl)acrylate (5a)**

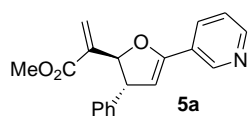

$^1\text{H NMR}$  (400 Hz,  $\text{CDCl}_3$ ):  $\delta$  (ppm) 8.91 (s, 1H), 8.56-8.54 (m, 1H), 7.95-7.93 (m, 1H), 7.36-7.28 (m, 6H), 6.33 (s, 1H), 5.85 (s, 1H), 5.55-5.54 (m, 1H), 5.34-5.33 (m, 1H), 4.06-4.05 (m, 1H), 3.75 (s, 3H).  $^{13}\text{C NMR}$  (100 Hz,  $\text{CDCl}_3$ ):  $\delta$  (ppm) 166.0, 153.1, 149.6, 146.9, 143.4, 139.6, 132.7, 128.8, 127.6, 127.3, 126.5, 124.5, 123.5, 100.9, 86.8, 56.2, 52.0. HRMS: exact mass calculated for  $[\text{M}+\text{H}]^+$  ( $\text{C}_{19}\text{H}_{18}\text{NO}_3$ ) requires  $m/z$  308.12812, found  $m/z$  308.12759; HPLC conditions: Daicel Chiralpak AS-H column, n-hexane/2-propanol = 90/10, flow rate = 1.0 mL/min,  $\lambda = 210$  nm, retention time:  $t_R$  (minor) = 10.949 min,  $t_R$  (major) = 18.327 min, 94% ee.

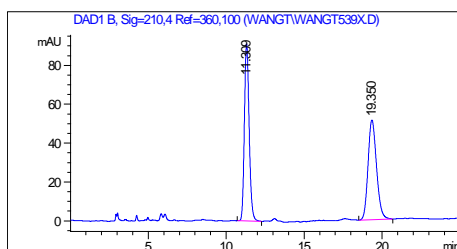

Racemic

| # | Time   | Area   | Height | Width  | Area%  | Symmetry |
|---|--------|--------|--------|--------|--------|----------|
| 1 | 11.309 | 1940.6 | 91.3   | 0.3301 | 49.967 | 0.813    |
| 2 | 19.35  | 1943.2 | 51.3   | 0.5776 | 50.033 | 0.803    |

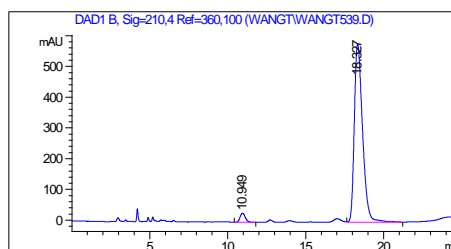

Chiral

| # | Time   | Area    | Height | Width  | Area%  | Symmetry |
|---|--------|---------|--------|--------|--------|----------|
| 1 | 10.949 | 695.1   | 29.6   | 0.3681 | 3.162  | 0.83     |
| 2 | 18.327 | 21289.5 | 580.3  | 0.56   | 96.838 | 0.622    |

**methyl 2-((2S,3R)-2,3-dihydro-3-phenyl-5-(pyridin-4-yl)furan-2-yl)acrylate (7a)**

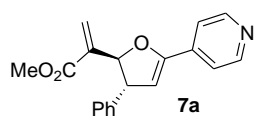

$^1\text{H}$  NMR (400 Hz,  $\text{CDCl}_3$ ):  $\delta$  (ppm) 8.63 (d,  $J = 5.2$  Hz, 2H), 7.52-7.51 (m, 2H), 7.36-7.24 (m, 5H), 6.33 (s, 1H), 5.84 (s, 1H), 5.69 (d,  $J = 3.2$  Hz, 1H), 5.34 (d,  $J = 3.2$  Hz, 1H), 4.07-4.05 (m, 1H), 3.75 (s, 3H).  $^{13}\text{C}$  NMR (100 Hz,  $\text{CDCl}_3$ ):  $\delta$  (ppm) 165.8, 153.6, 150.2, 143.0, 139.4, 137.4, 128.8, 127.6, 127.3, 124.6, 119.5, 103.5, 86.9, 56.1, 51.9. HRMS: exact mass calculated for  $[\text{M}+\text{H}]^+$  ( $\text{C}_{19}\text{H}_{18}\text{NO}_3$ ) requires  $m/z$  308.12812, found  $m/z$  308.12778; HPLC conditions: Daicel Chiralpak OD-H column, n-hexane/2-propanol = 90/10, flow rate = 1.0 mL/min,  $\lambda = 210$  nm, retention time:  $t_R$  (minor) = 11.074 min,  $t_R$  (major) = 13.49 min, 92% ee.

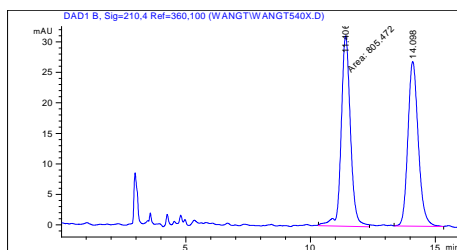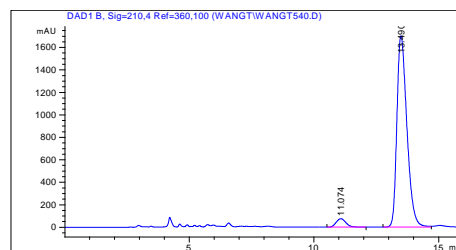

Racemic

Chiral

| # | Time   | Area  | Height | Width  | Area%  | Symmetry | # | Time   | Area    | Height | Width  | Area%  | Symmetry |
|---|--------|-------|--------|--------|--------|----------|---|--------|---------|--------|--------|--------|----------|
| 1 | 11.406 | 805.5 | 31.2   | 0.4298 | 50.797 | 0.89     | 1 | 11.074 | 2026.3  | 74.8   | 0.434  | 4.091  | 0.86     |
| 2 | 14.098 | 780.2 | 27     | 0.445  | 49.203 | 0.825    | 2 | 13.49  | 47507.8 | 1702.7 | 0.4295 | 95.909 | 0.644    |

## Copies of NMR spectra

### methyl 2-((2S,3R)-2,3-dihydro-3-phenyl-5-(pyridin-2-yl)furan-2-yl)acrylate (3aa)

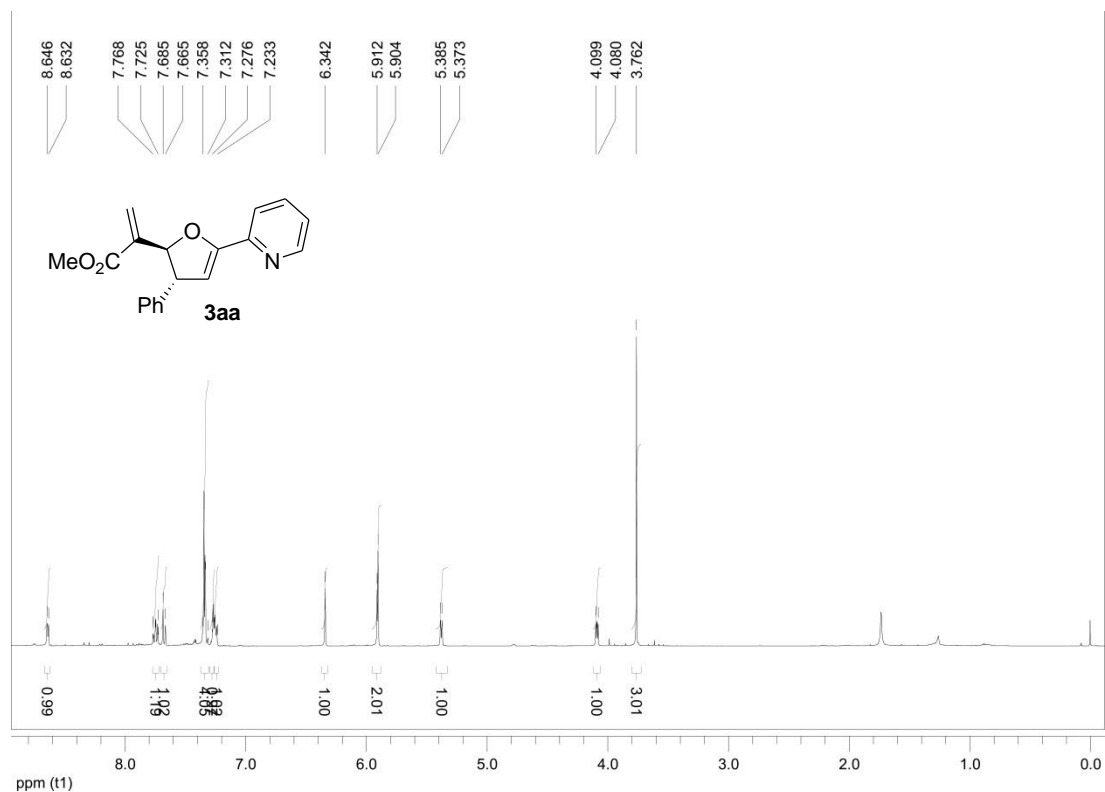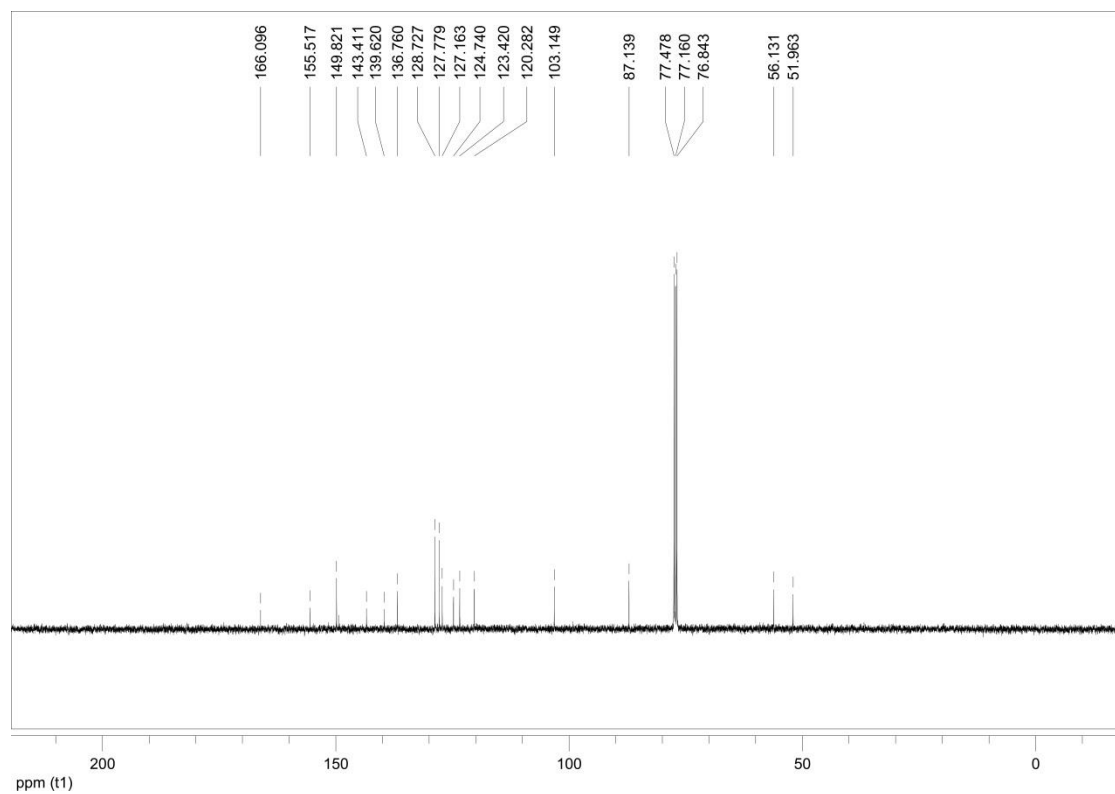

ethyl 2-((2S,3R)-2,3-dihydro-3-phenyl-5-(pyridin-2-yl)furan-2-yl)acrylate (3ab)

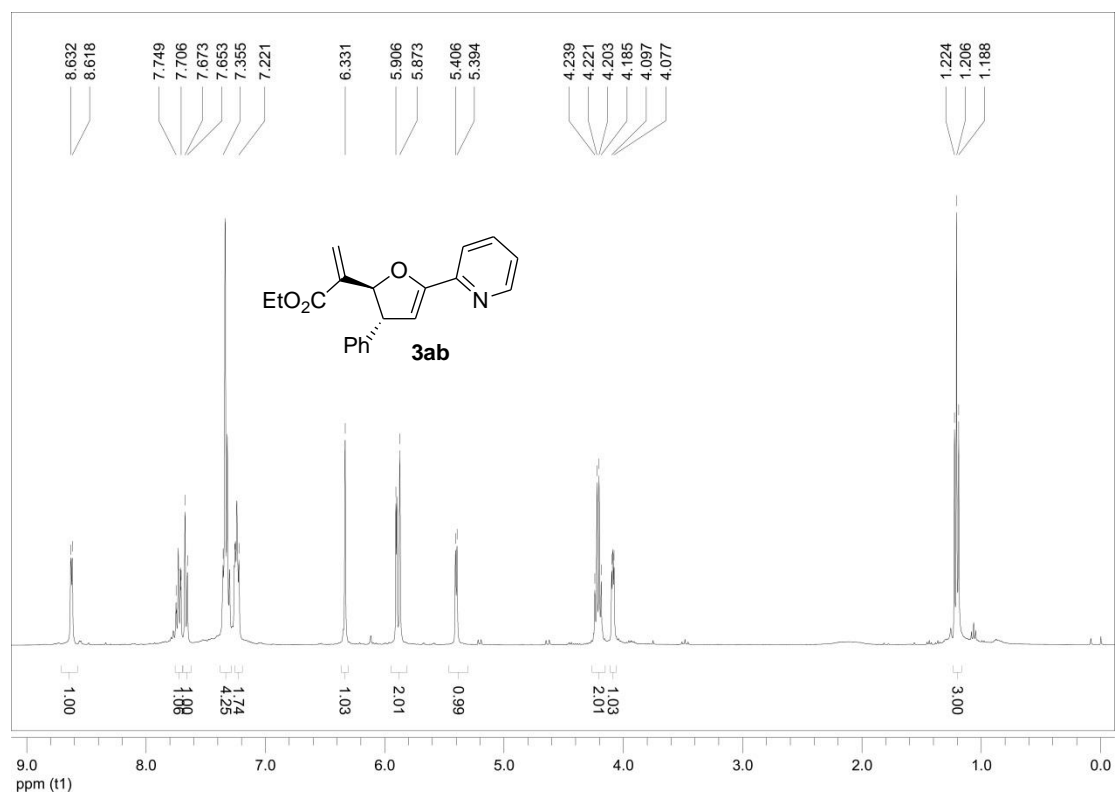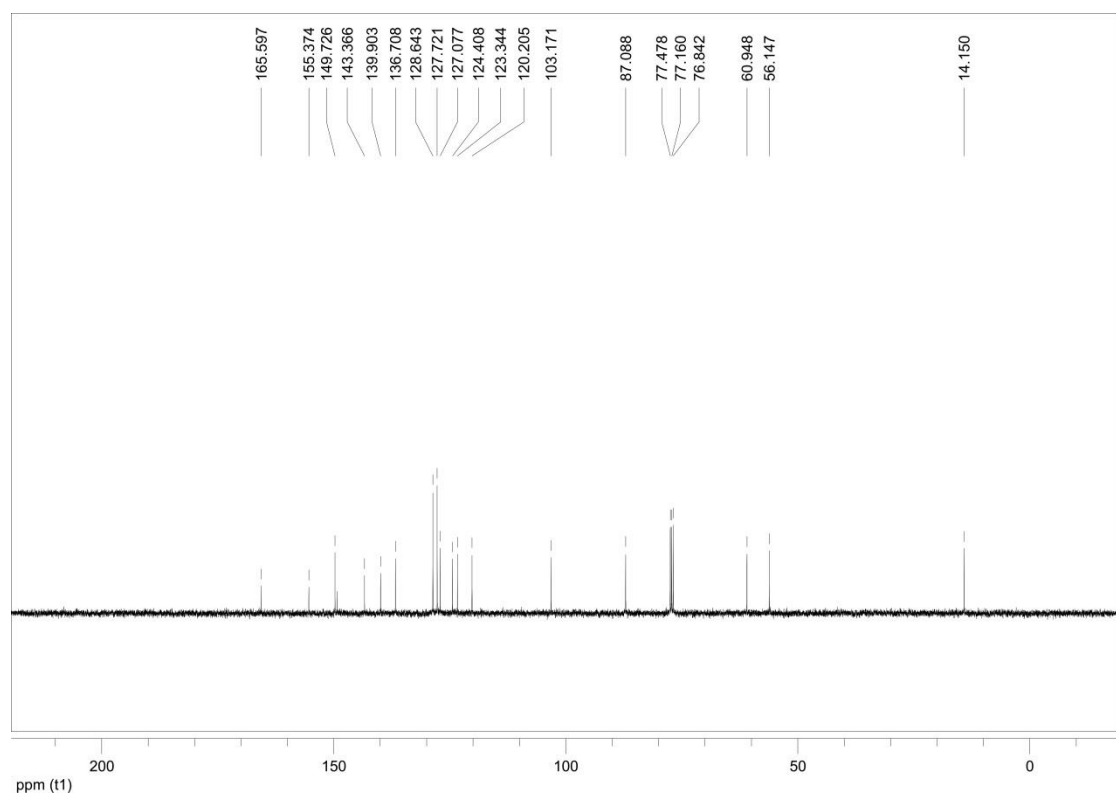

benzyl 2-((2S,3R)-2,3-dihydro-3-phenyl-5-(pyridin-2-yl)furan-2-yl)acrylate (3ac)

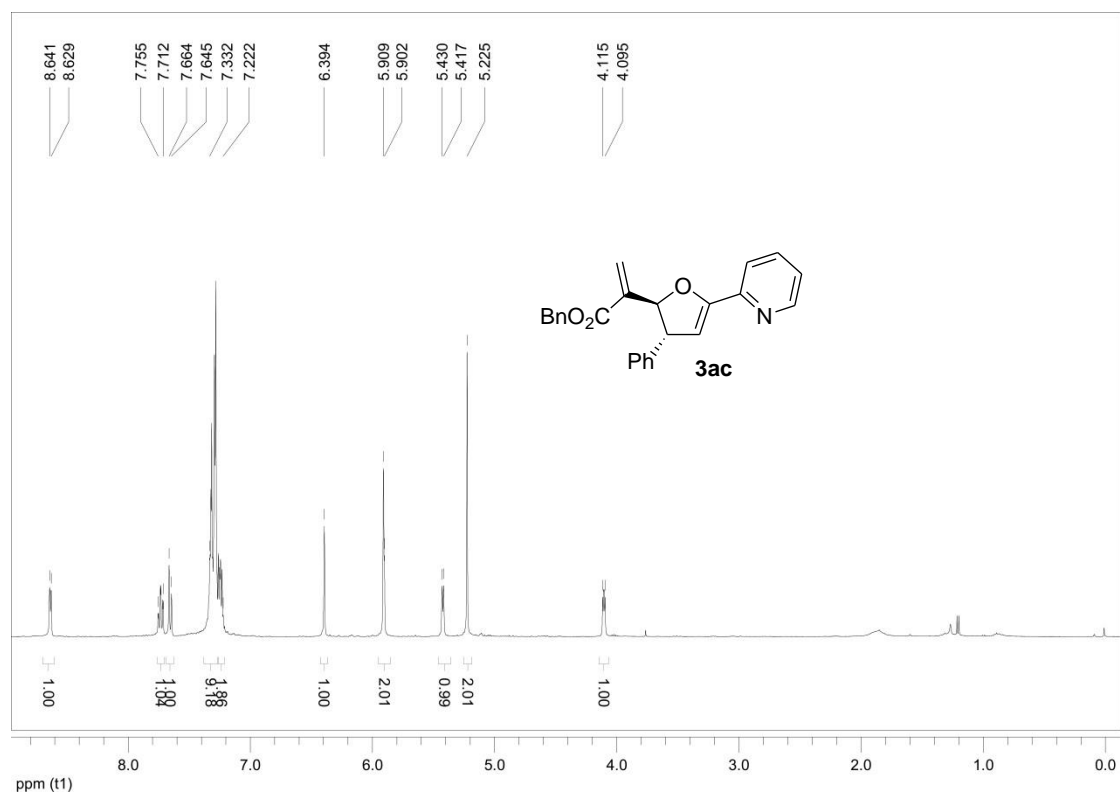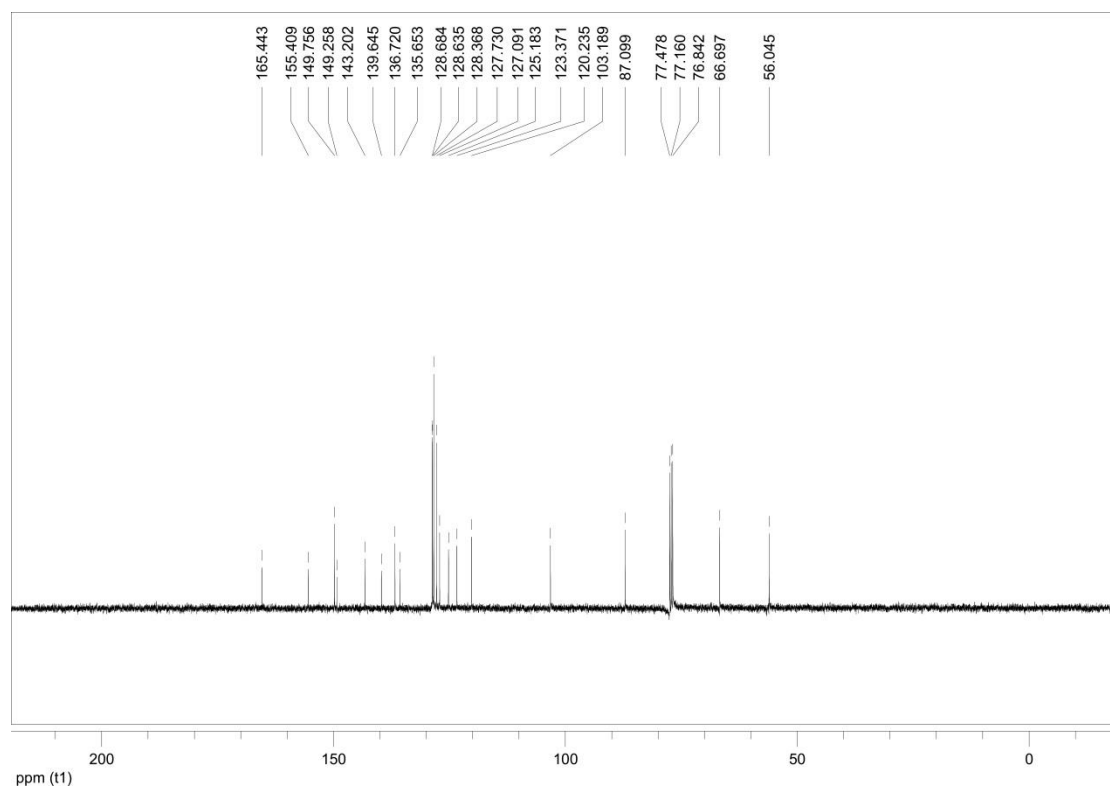



**methyl 2-((2S,3R)-3-(2-bromophenyl)-2,3-dihydro-5-(pyridin-2-yl)furan-2-yl)acrylate (3ba)**

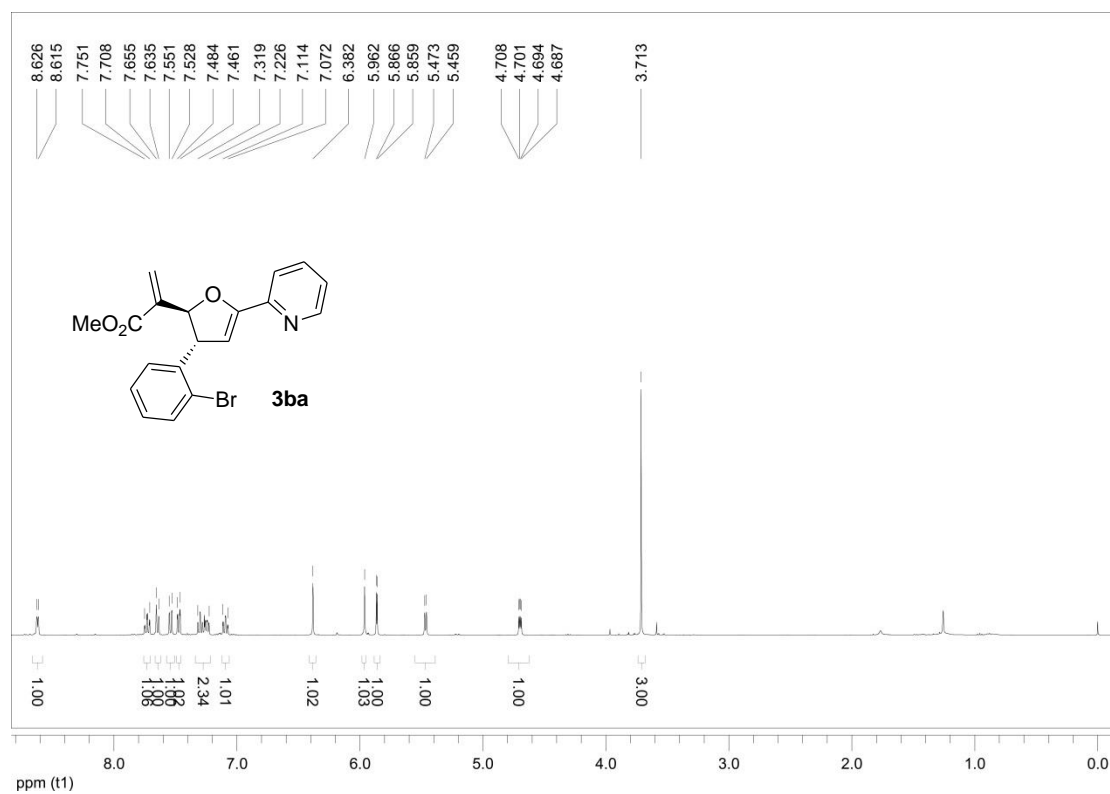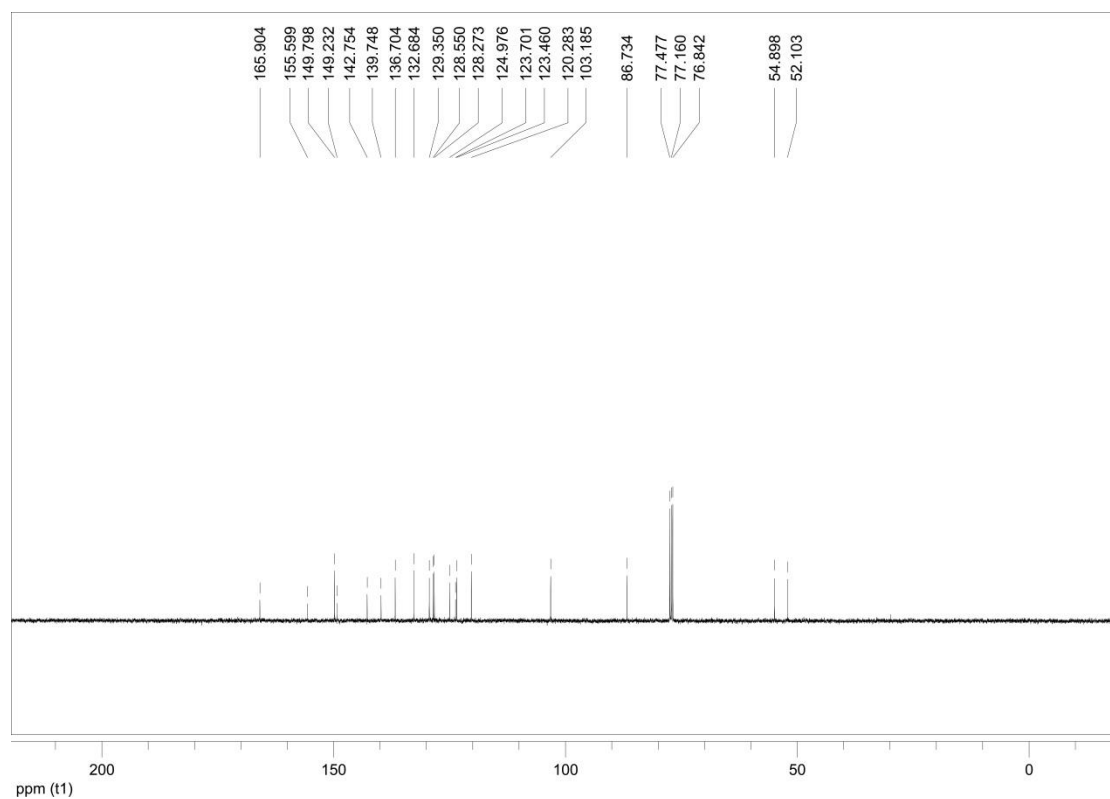

**methyl 2-((2S,3R)-2,3-dihydro-3-(2-methoxyphenyl)-5-(pyridin-2-yl)furan-2-yl)acrylate  
(3ca)**

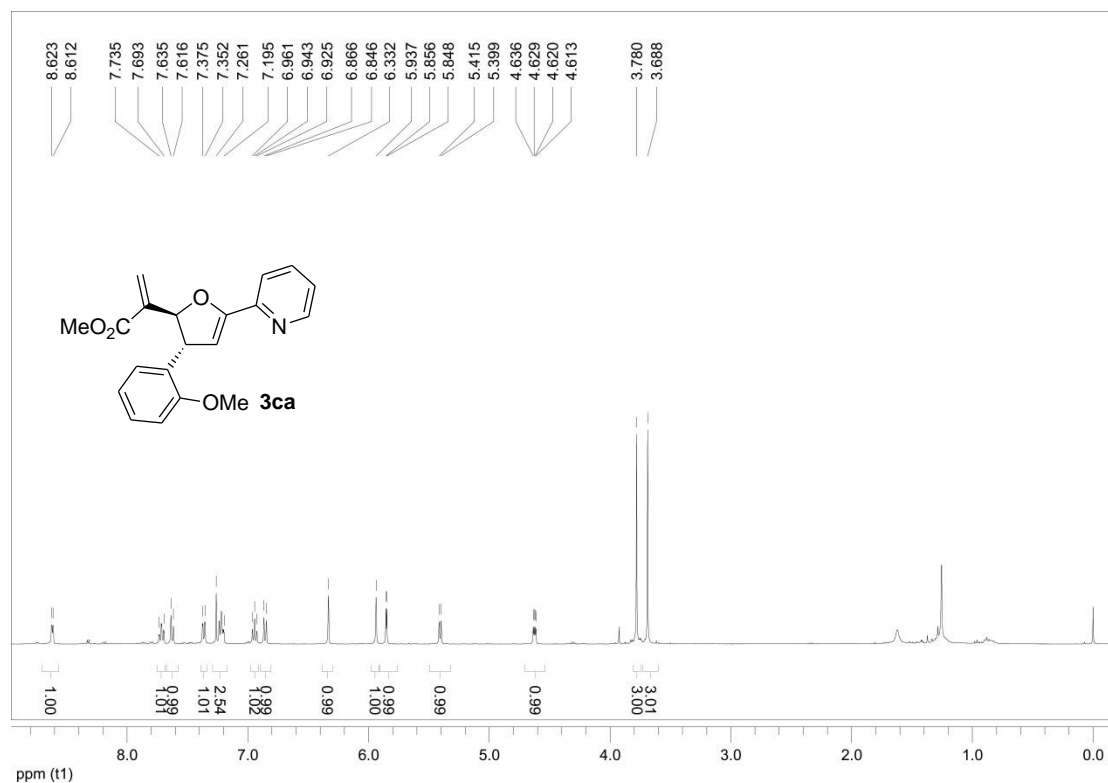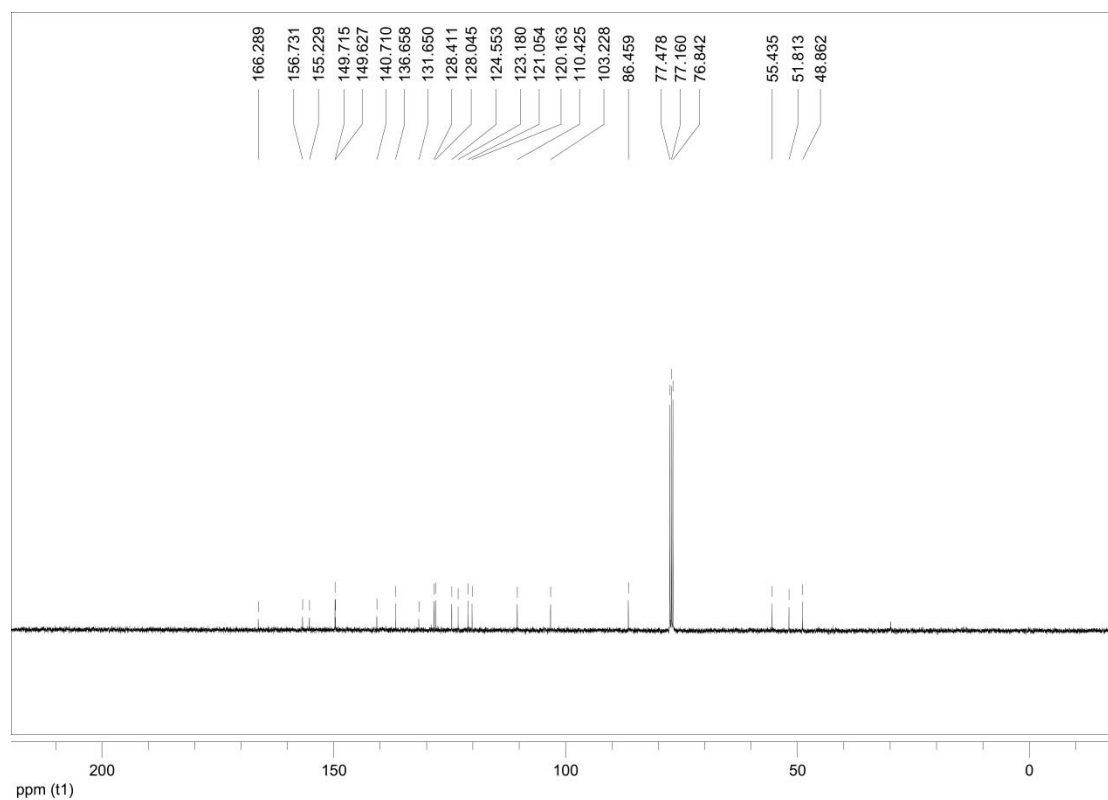

**(4R,5S)-tert-butyl 5-(1-(methoxycarbonyl)vinyl)-4,5-dihydro-4-phenylfuran-2-carboxylate  
(3da)**

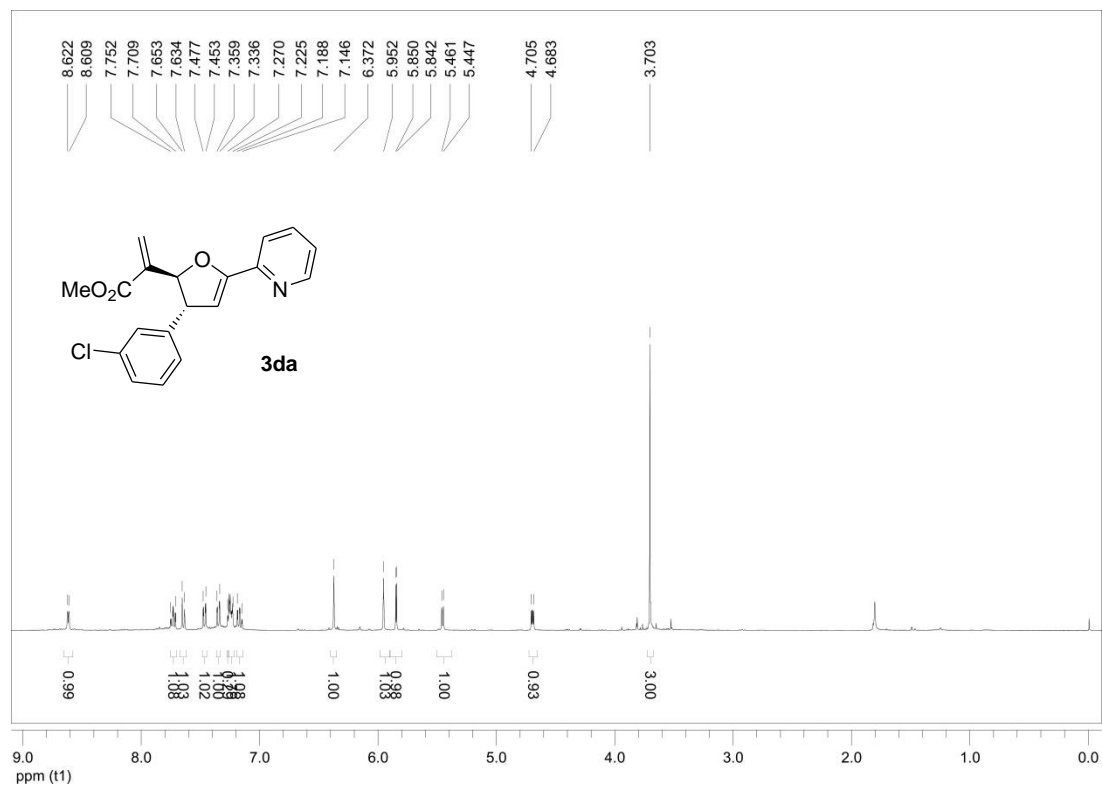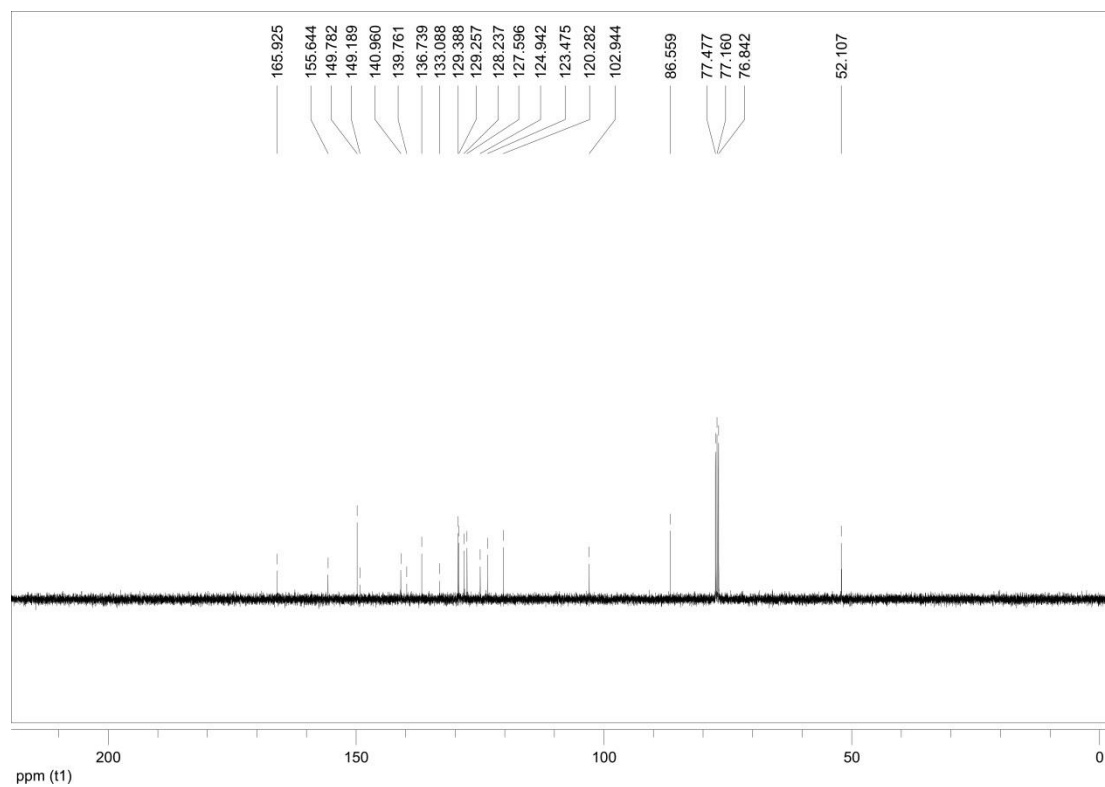

**methyl 2-((2S,3R)-3-(3-bromophenyl)-2,3-dihydro-5-(pyridin-2-yl)furan-2-yl)acrylate (3ea)**

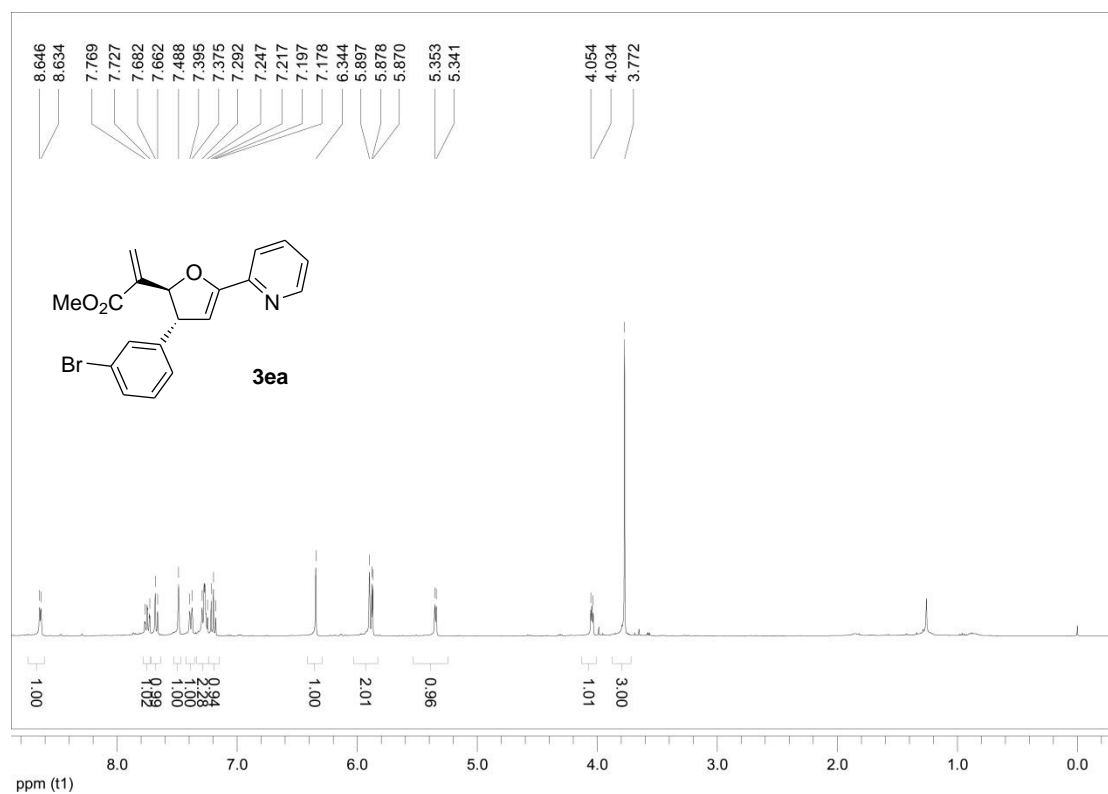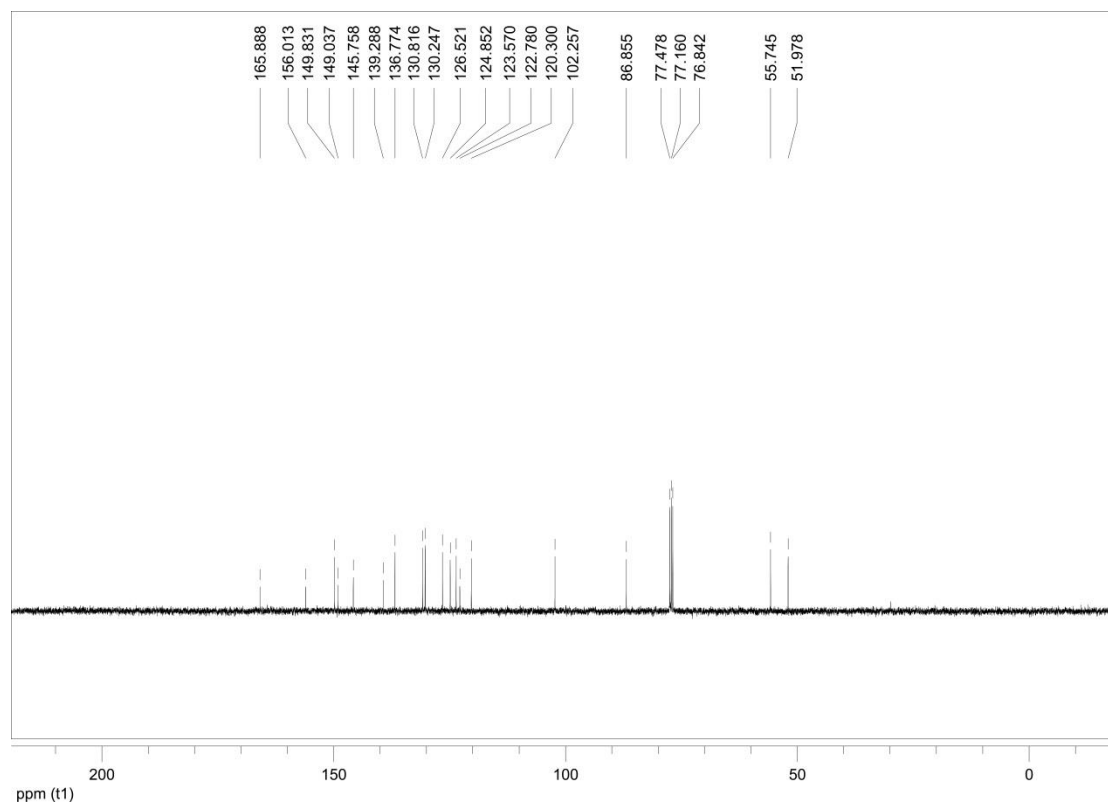

**methyl 2-((2S,3R)-2,3-dihydro-3-(3-methoxyphenyl)-5-(pyridin-2-yl)furan-2-yl)acrylate  
(3fa)**

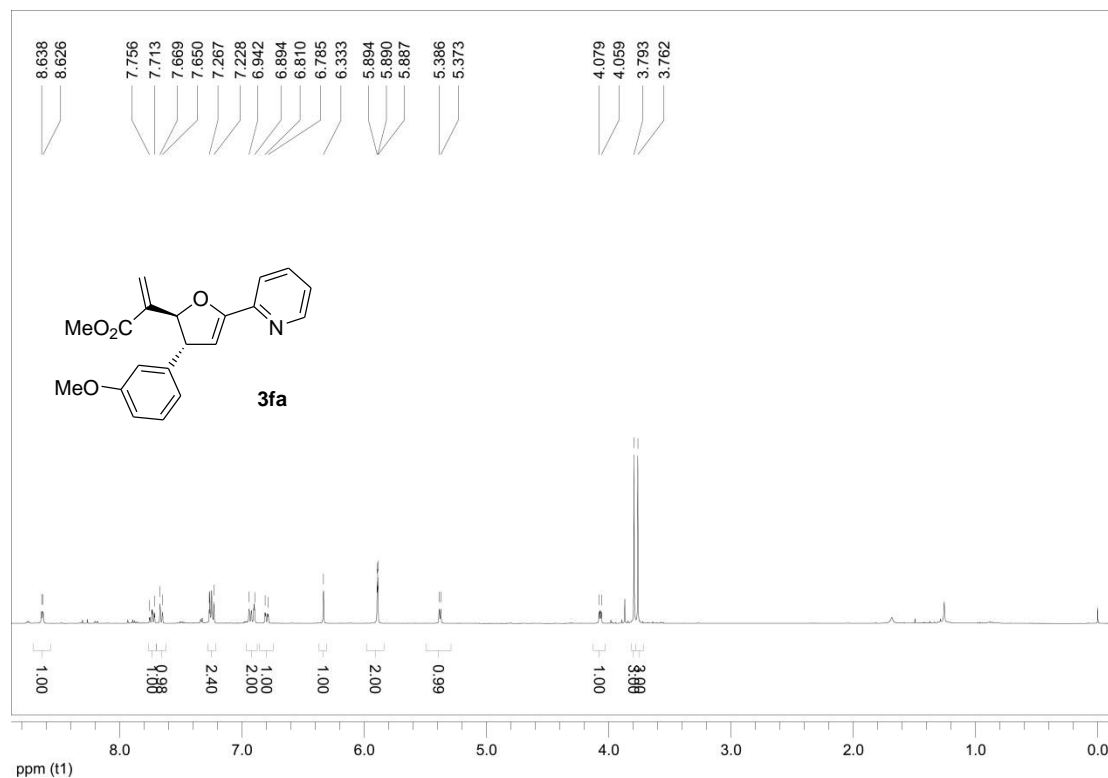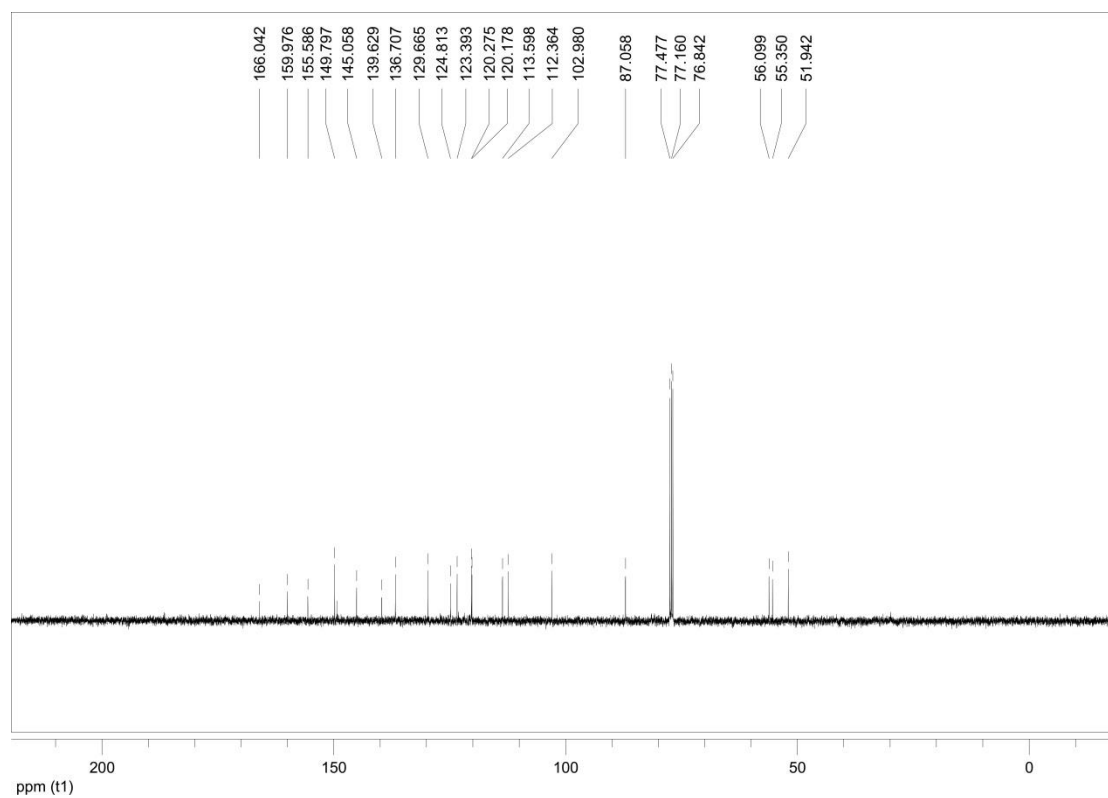

**methyl 2-((2S,3R)-3-(4-fluorophenyl)-2,3-dihydro-5-(pyridin-2-yl)furan-2-yl)acrylate (3ga)**

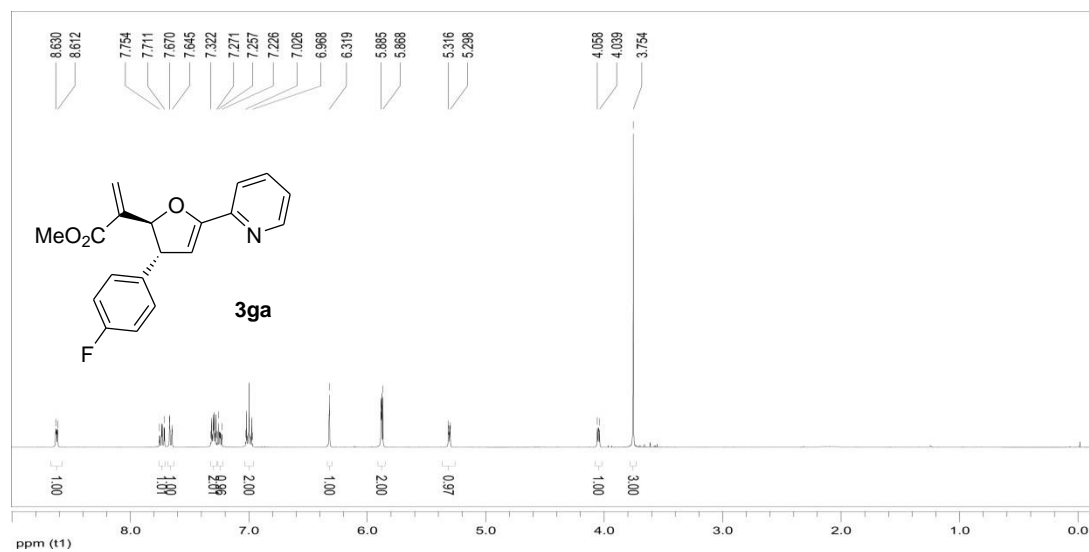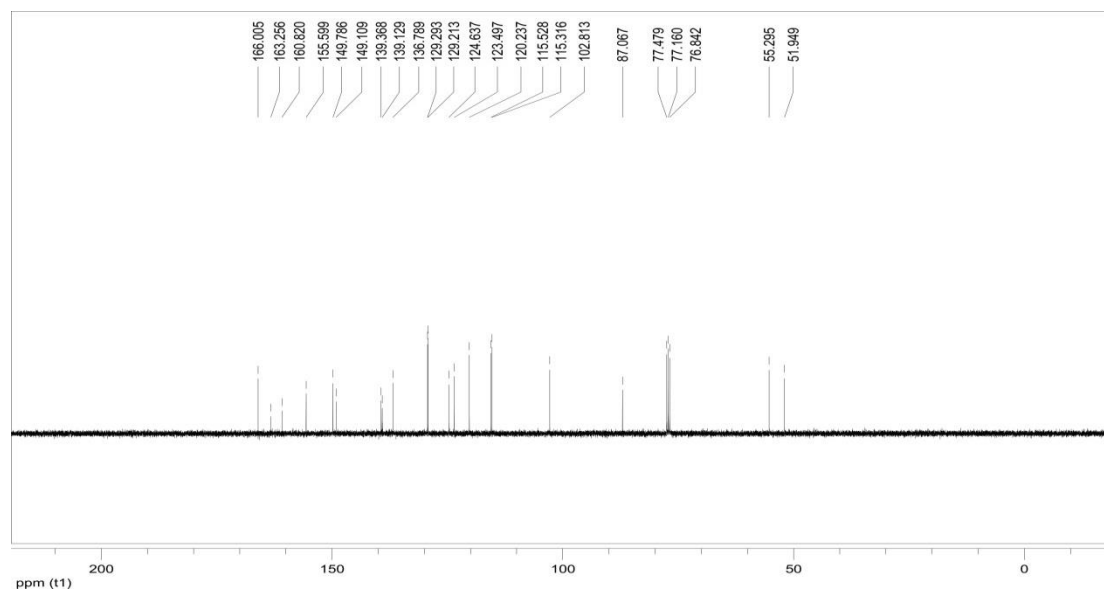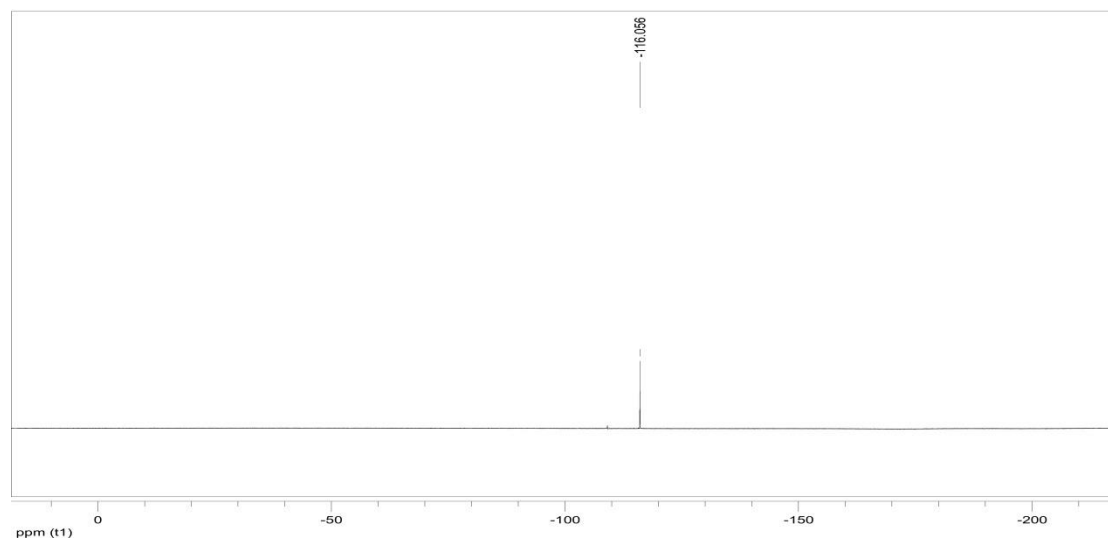

**methyl 2-((2S,3R)-3-(4-chlorophenyl)-2,3-dihydro-5-(pyridin-2-yl)furan-2-yl)acrylate (3ha)**

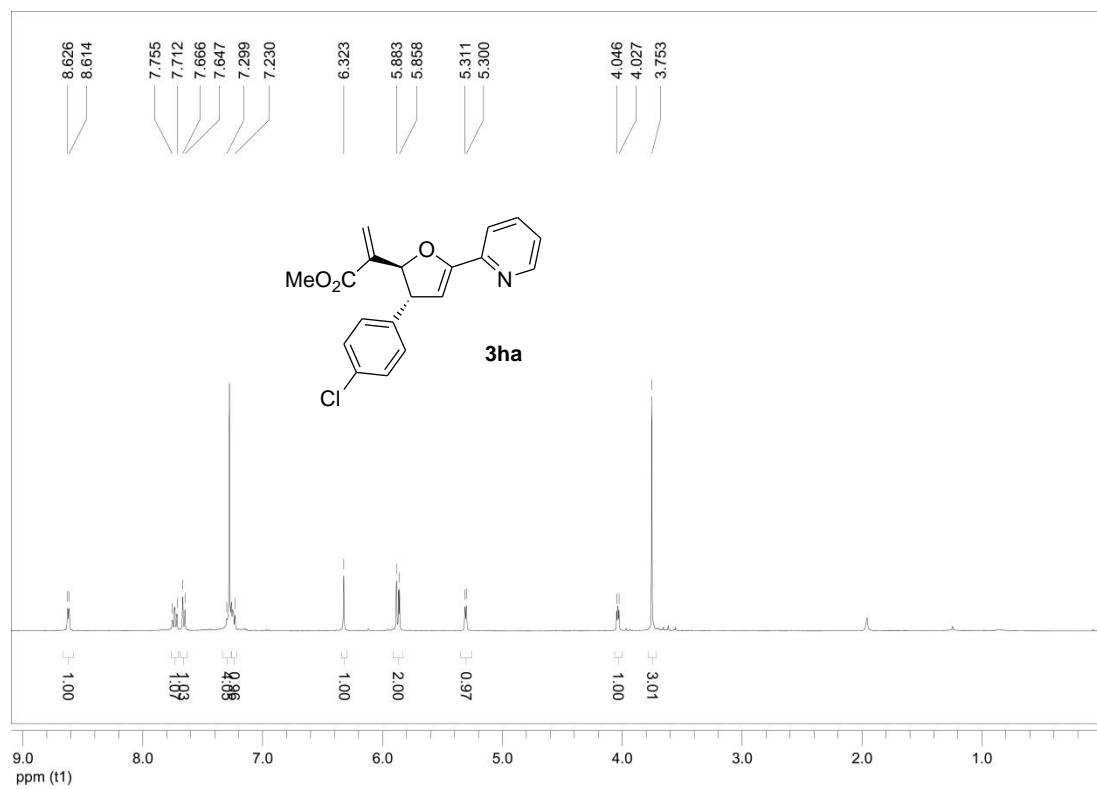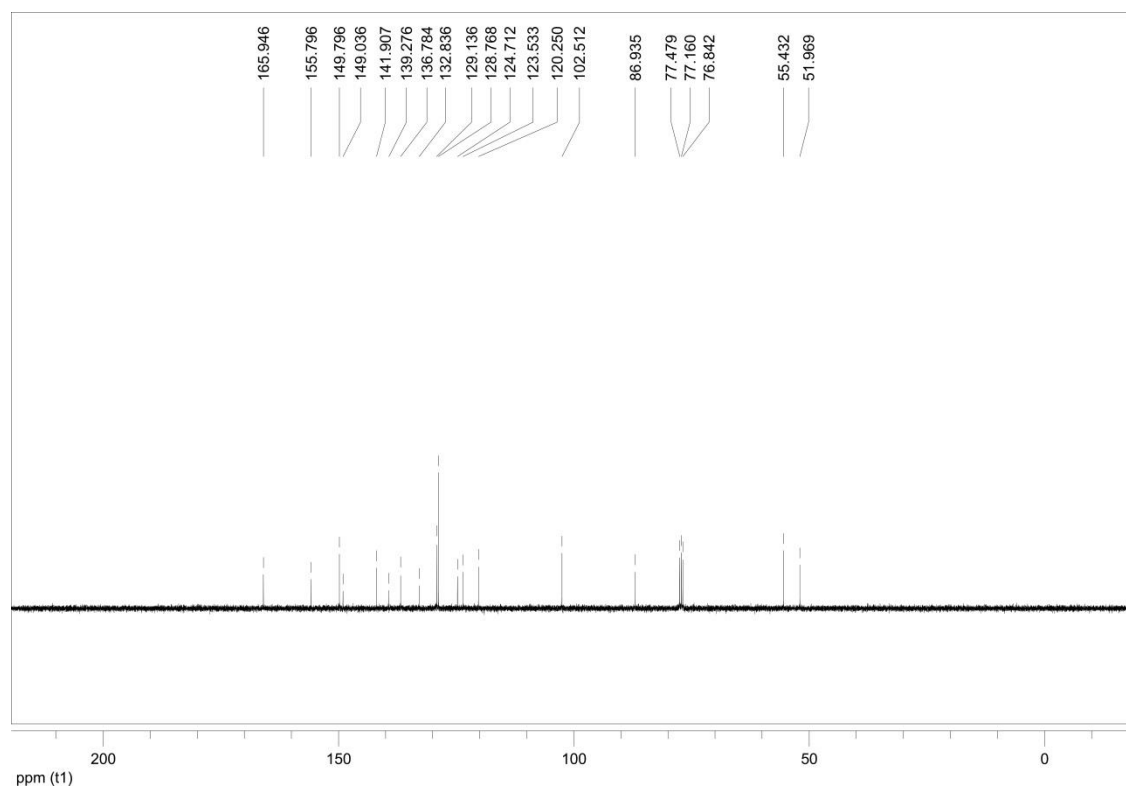

**methyl 2-((2S,3R)-3-(4-bromophenyl)-2,3-dihydro-5-(pyridin-2-yl)furan-2-yl)acrylate (3ia)**

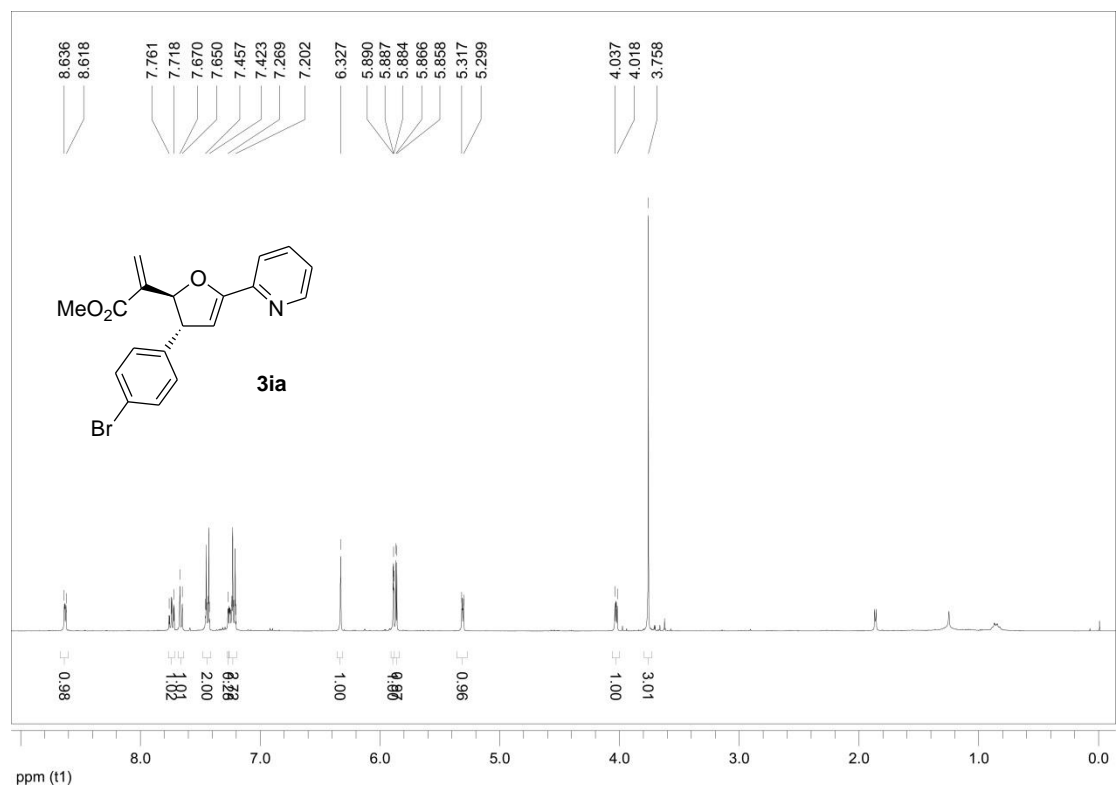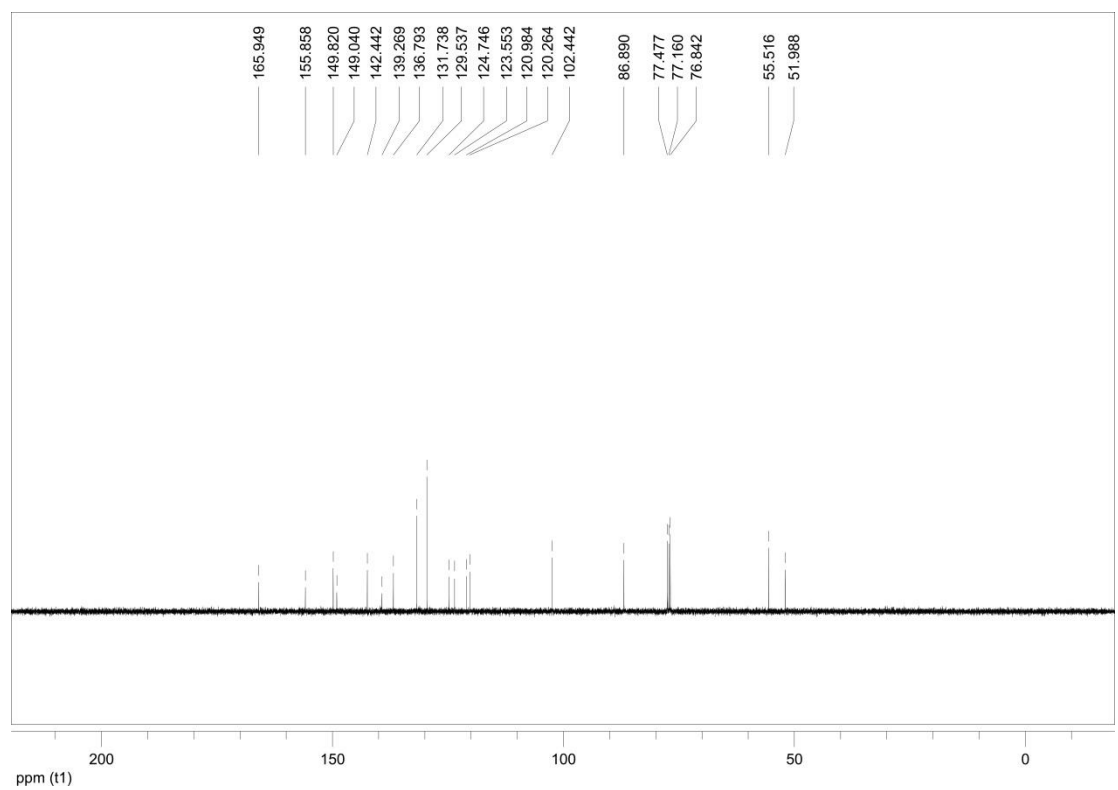



**methyl 2-((2S,3R)-3-(4-(trifluoromethyl)phenyl)-2,3-dihydro-5-(pyridin-2-yl)furan-2-yl)acrylate (3ja)**

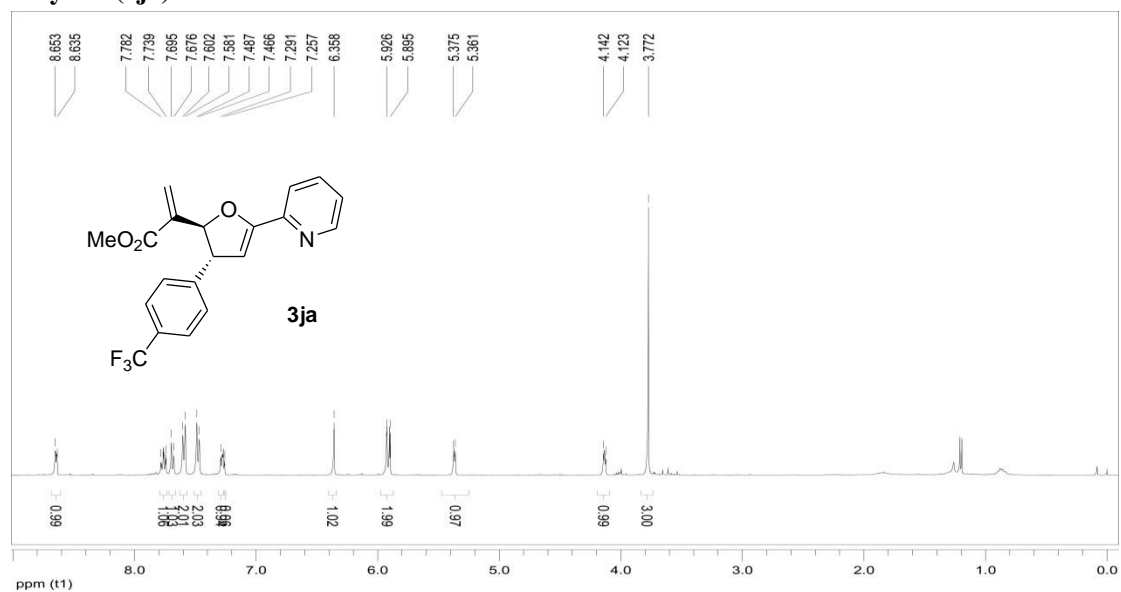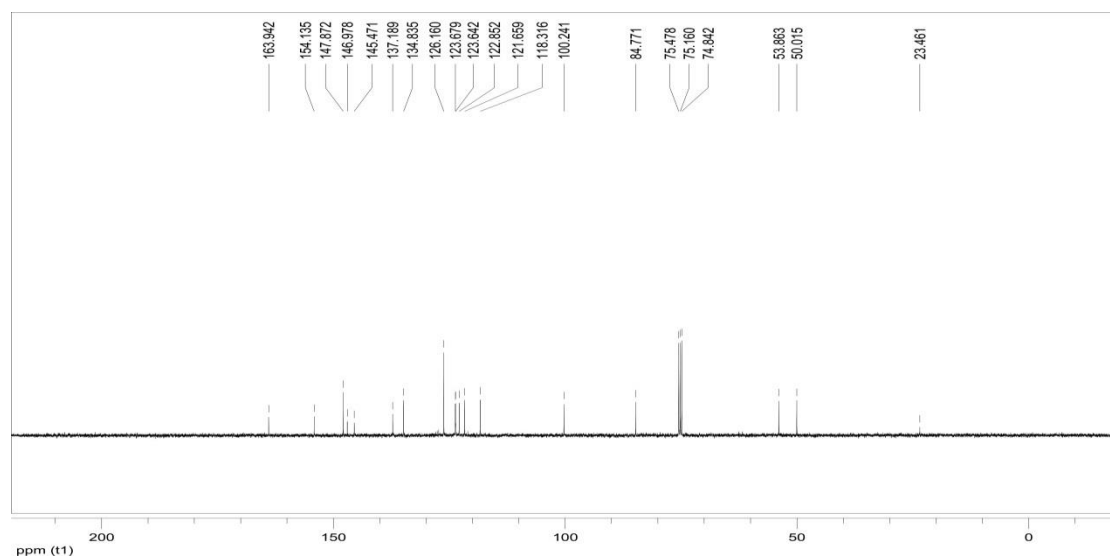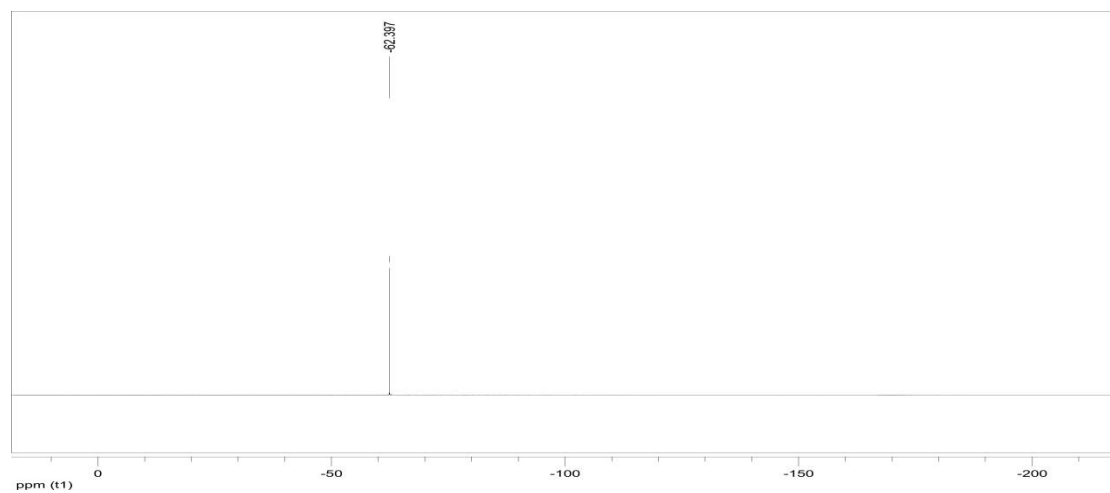

methyl 2-((2S,3R)-2,3-dihydro-3-(4-nitrophenyl)-5-(pyridin-2-yl)furan-2-yl)acrylate (3ka)

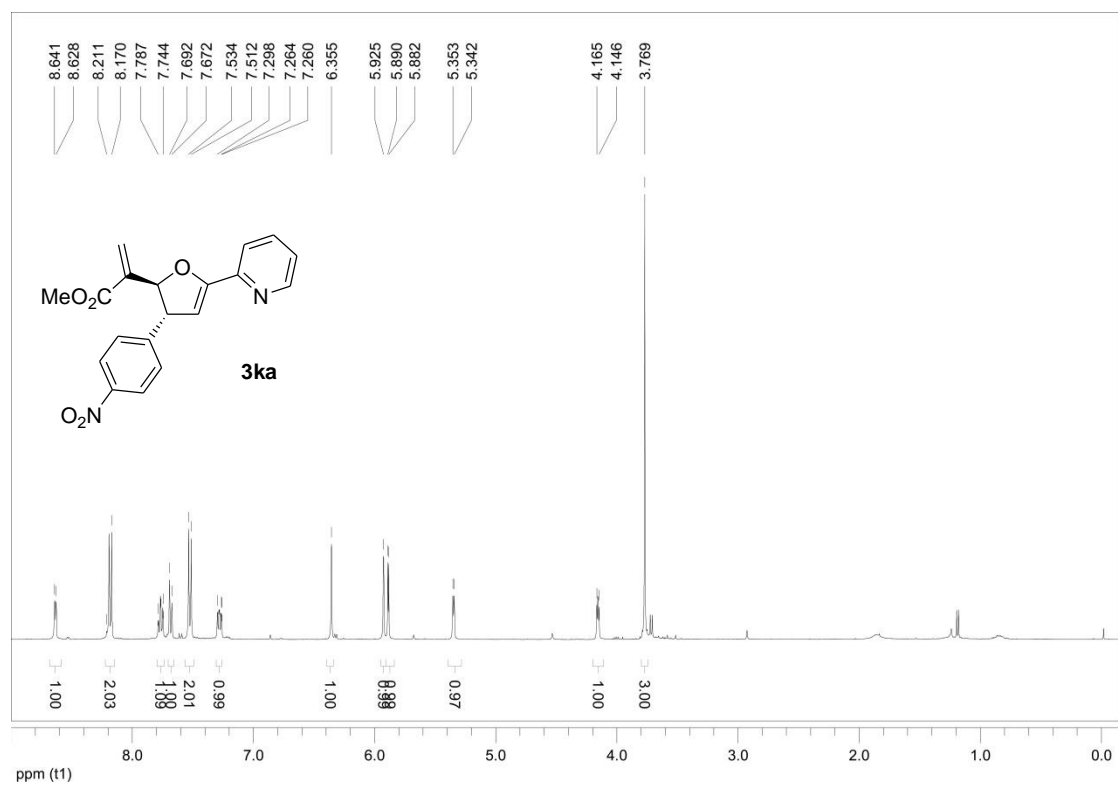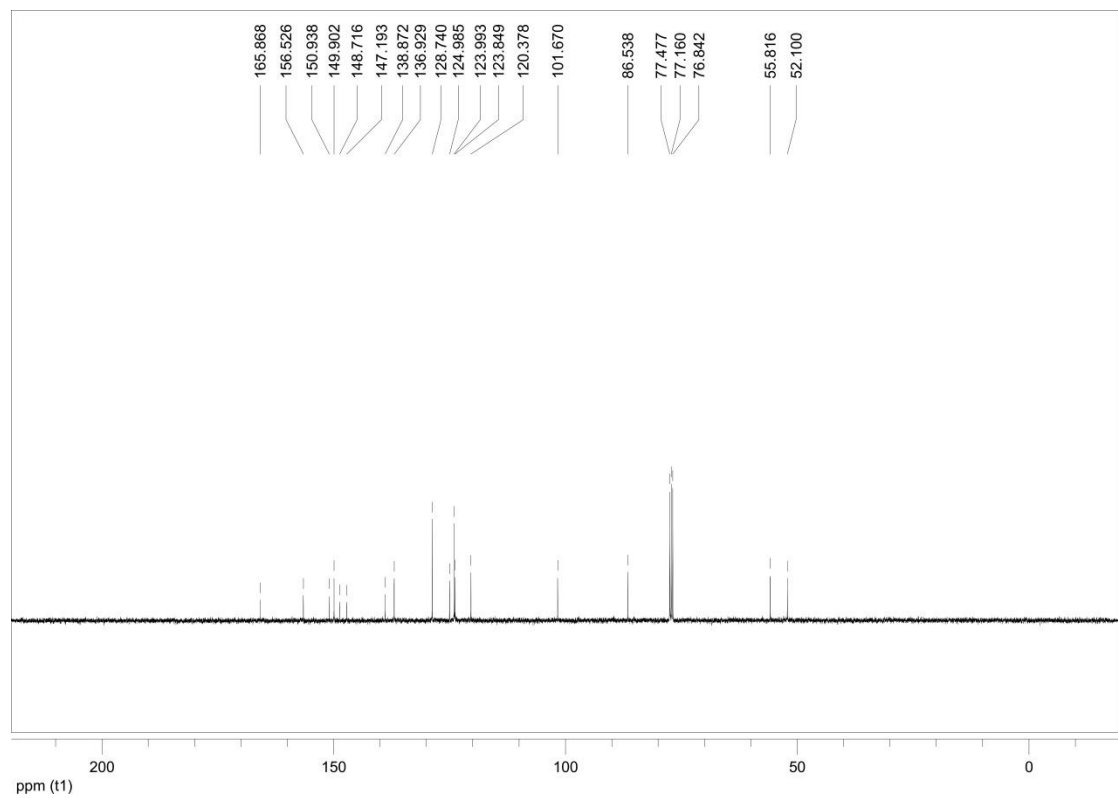

**methyl 2-((2S,3R)-2,3-dihydro-5-(pyridin-2-yl)-3-p-tolylfuran-2-yl)acrylate (3la)**

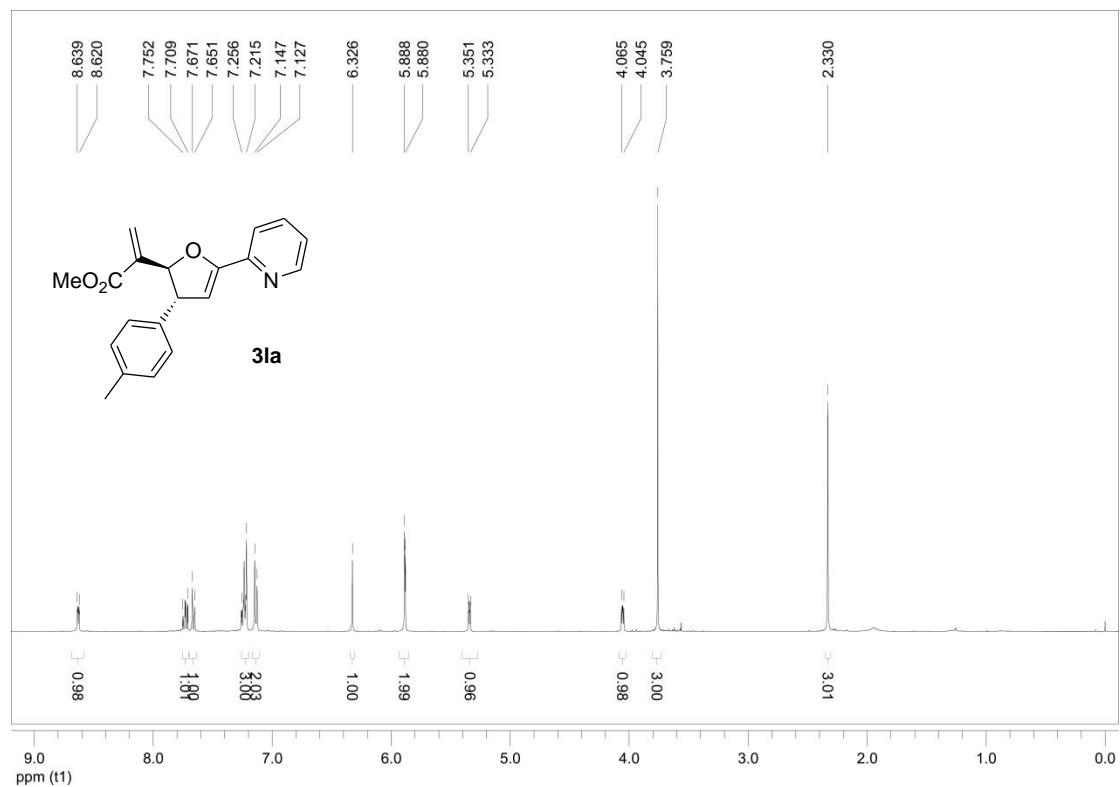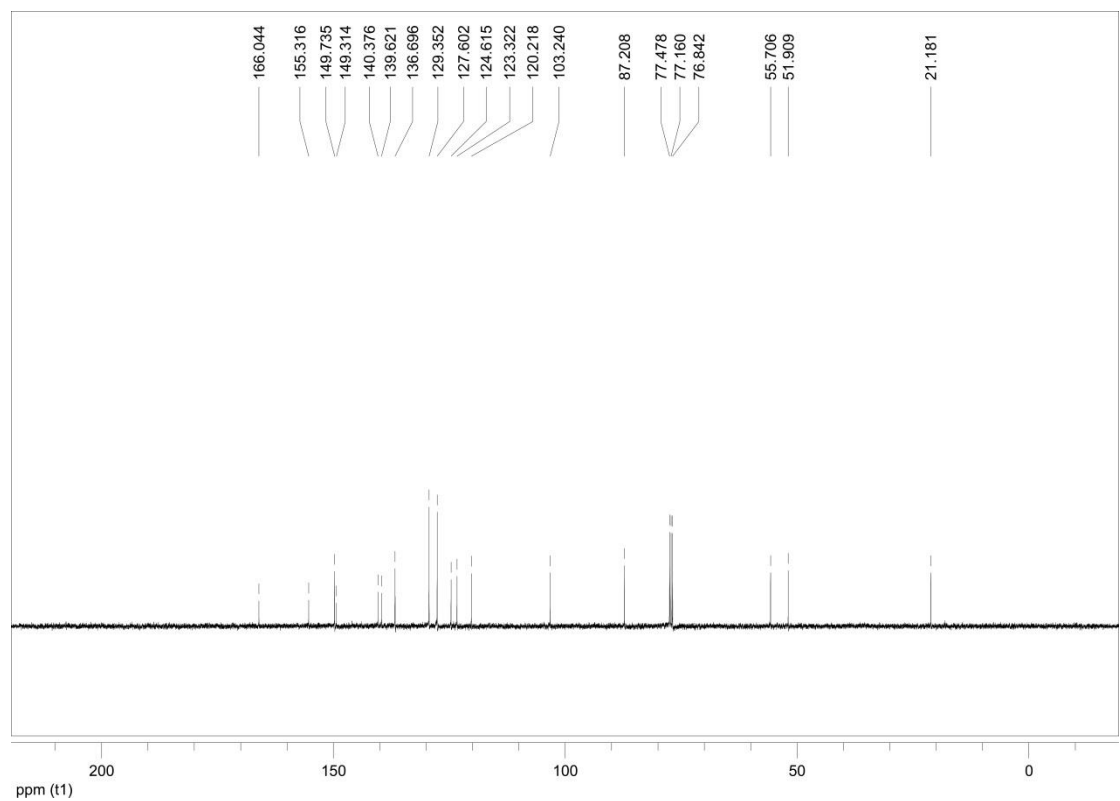

methyl 2-((2S,3R)-2,3-dihydro-3-(naphthalen-2-yl)-5-(pyridin-2-yl)furan-2-yl)acrylate  
(3ma)

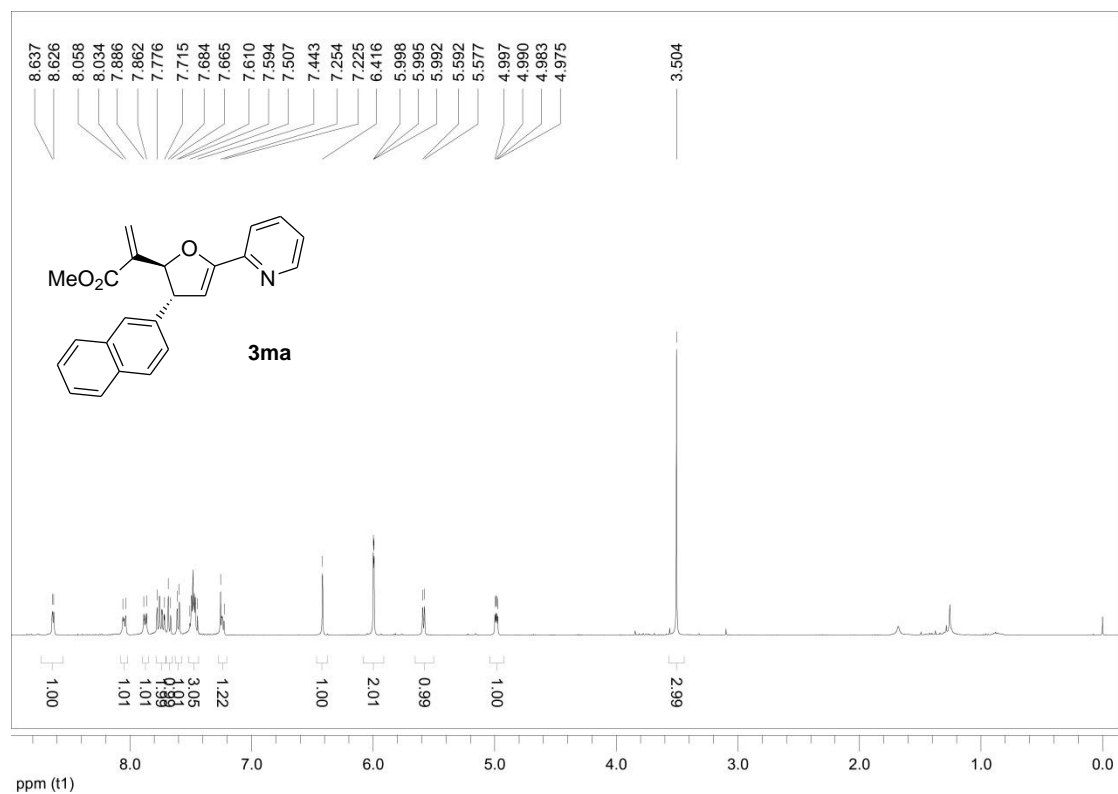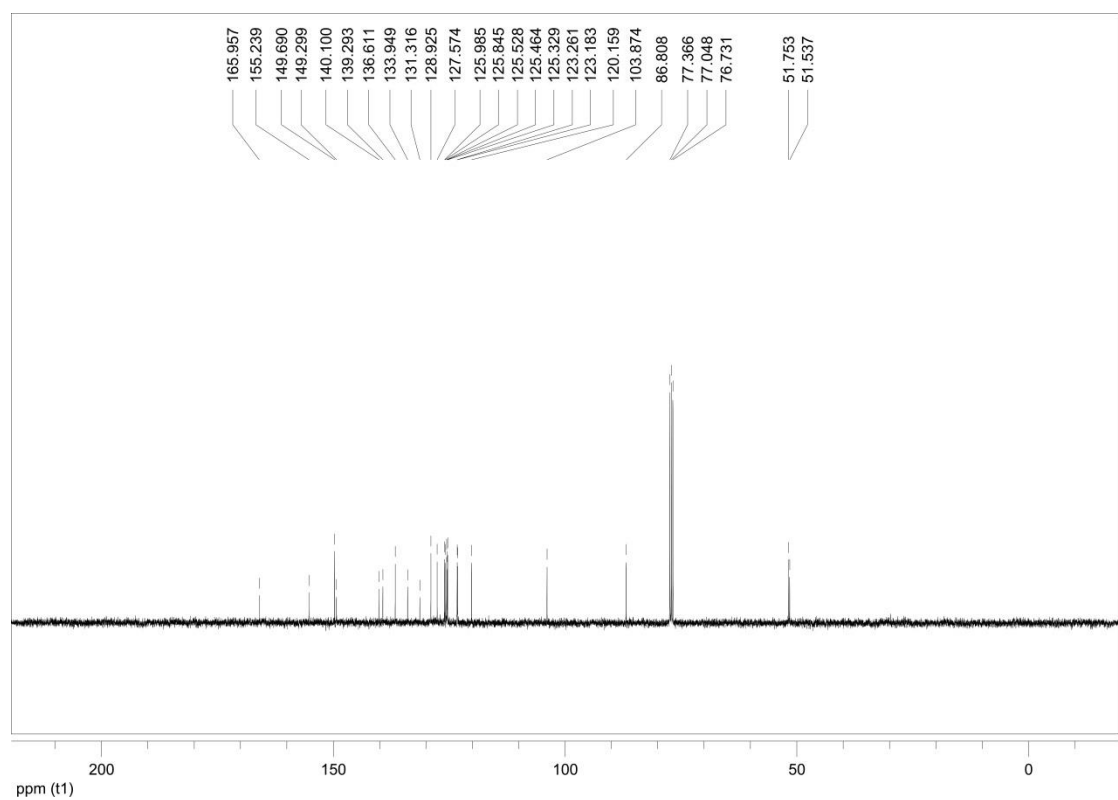

**methyl 2-((2S,3S)-2,3-dihydro-5-(pyridin-2-yl)-3-(thiophen-2-yl)furan-2-yl)acrylate (3na)**

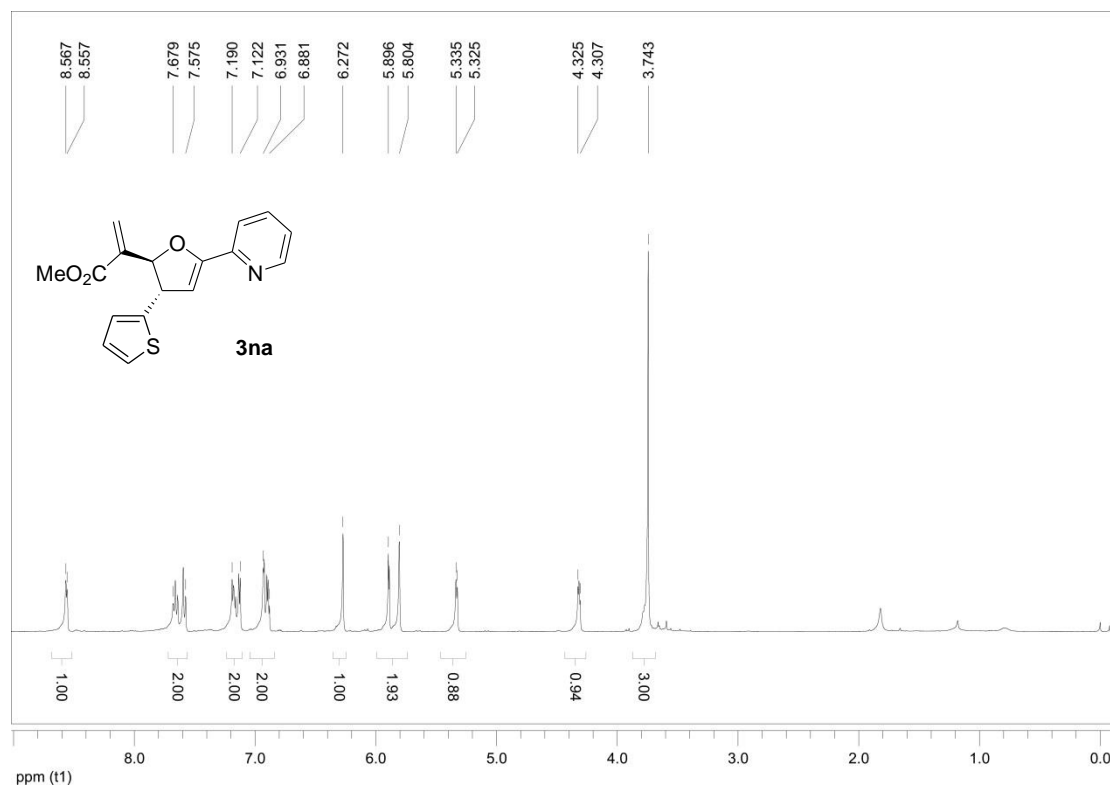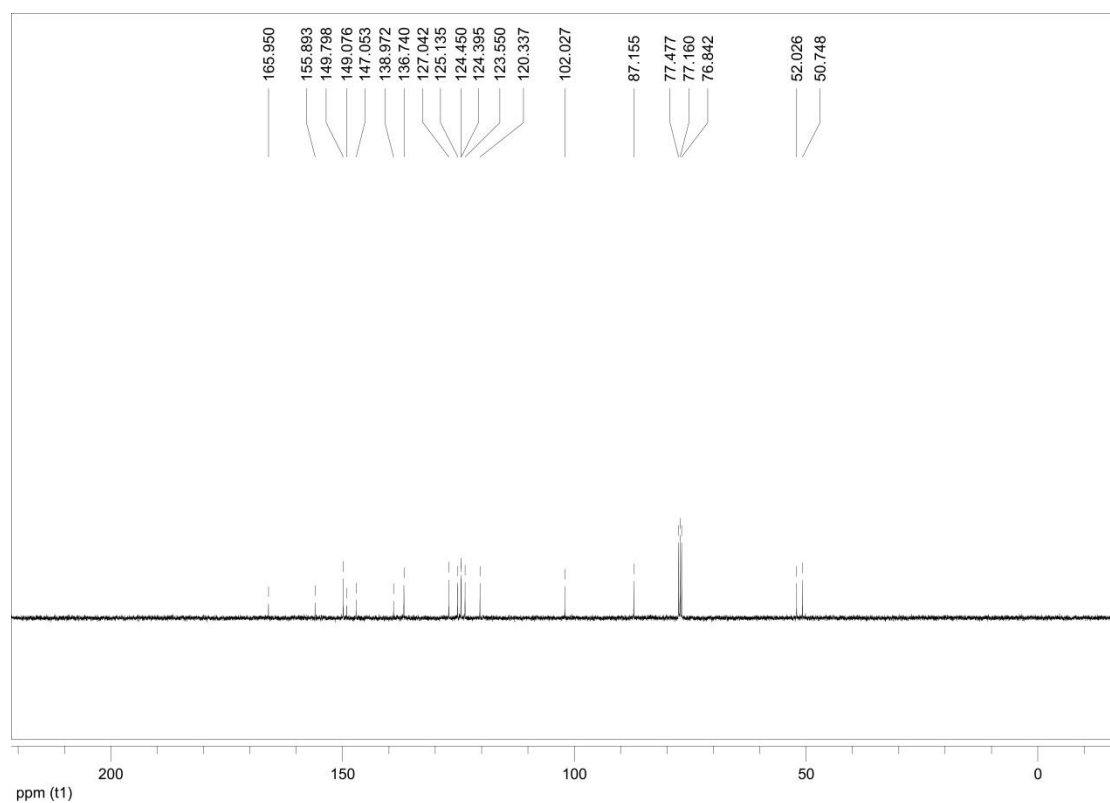

methyl 2-((2S,3R)-2,3-dihydro-3,5-di(pyridin-2-yl)furan-2-yl)acrylate (3oa)

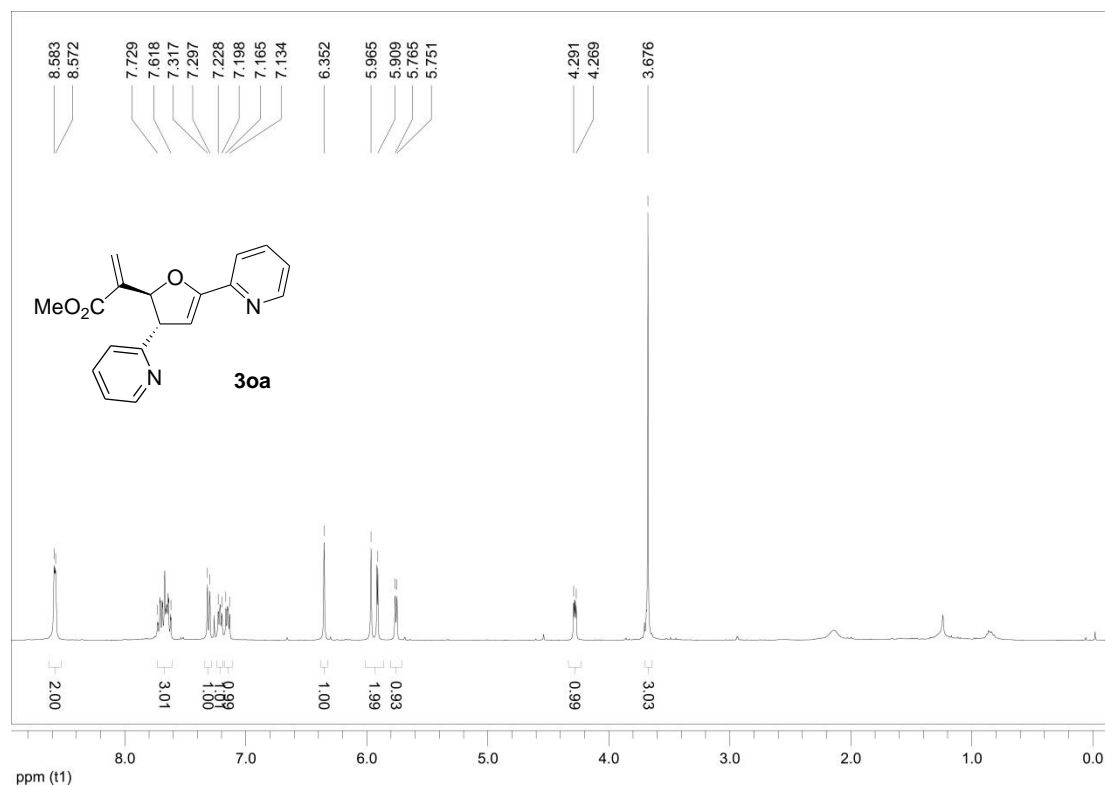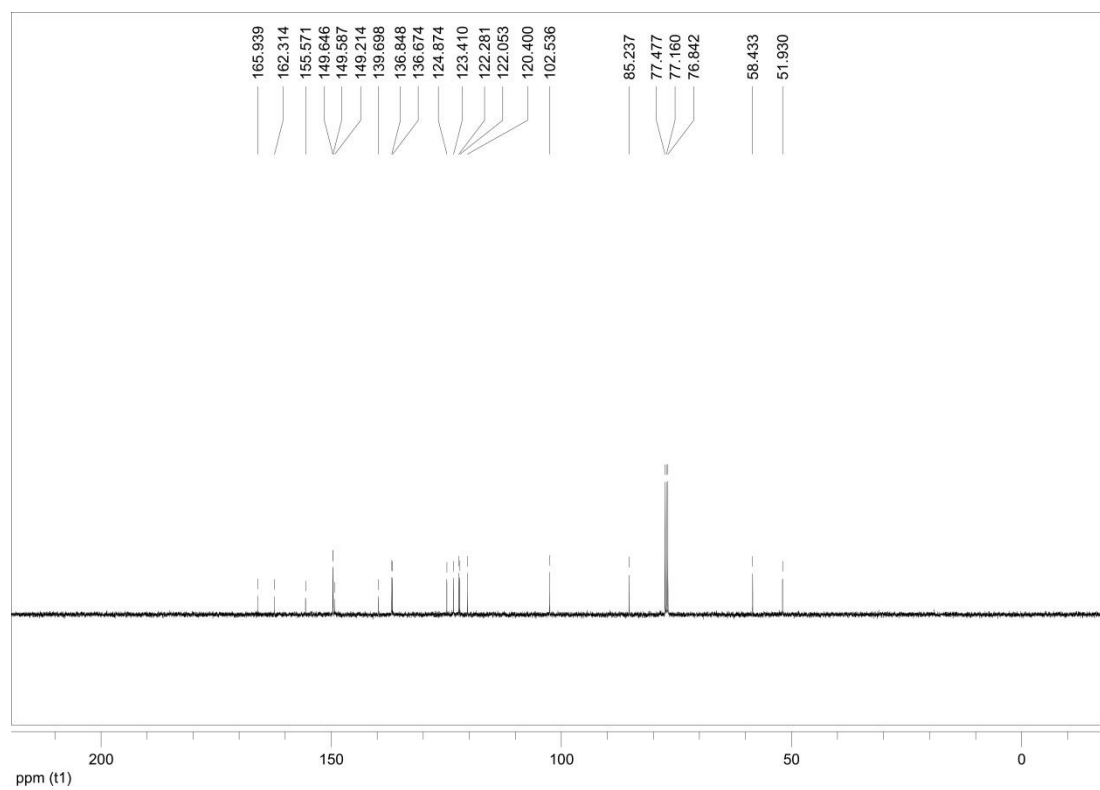

**methyl 2-((2S,3S)-2,3-dihydro-5-(pyridin-2-yl)-3-styrylfuran-2-yl)acrylate (3pa)**

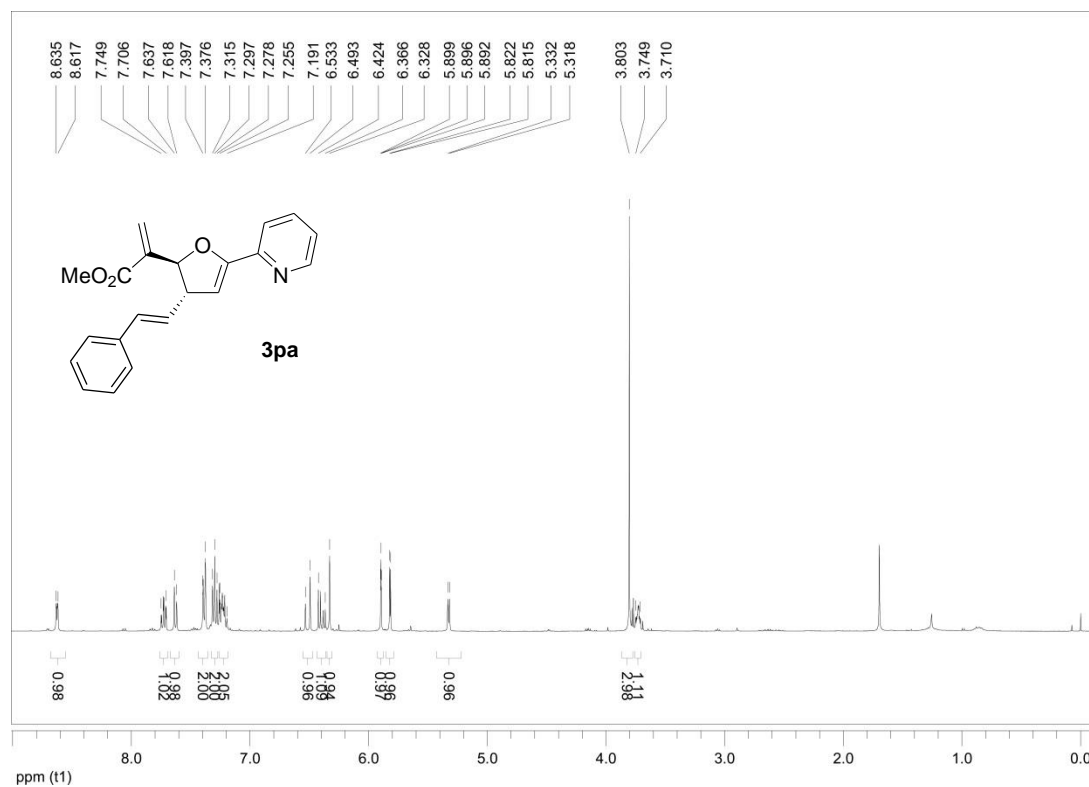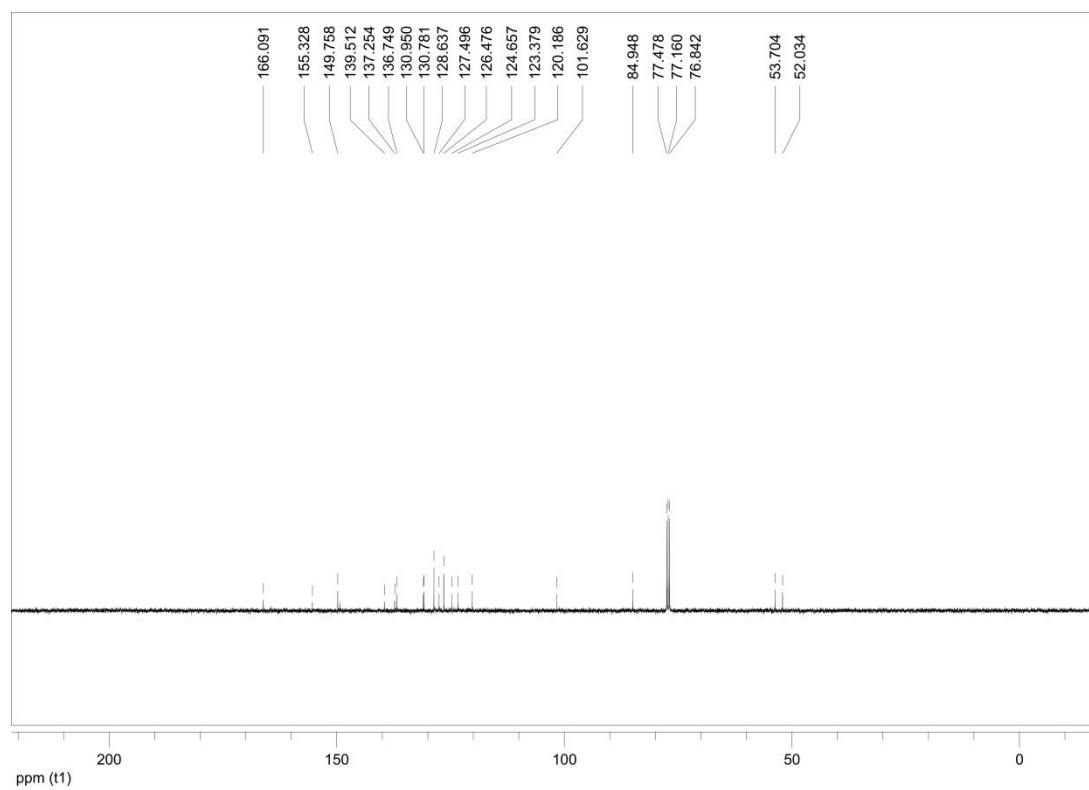

methyl 2-((2S,3S)-2,3-dihydro-3-methyl-5-(pyridin-2-yl)furan-2-yl)acrylate (3qa)

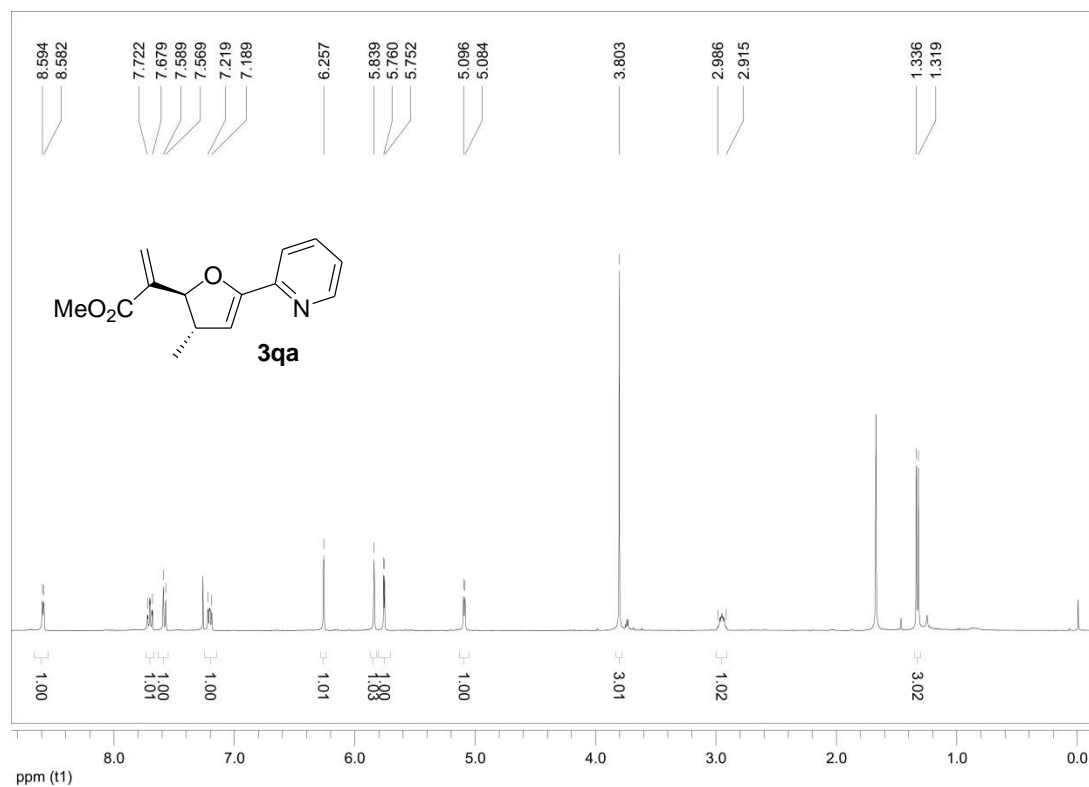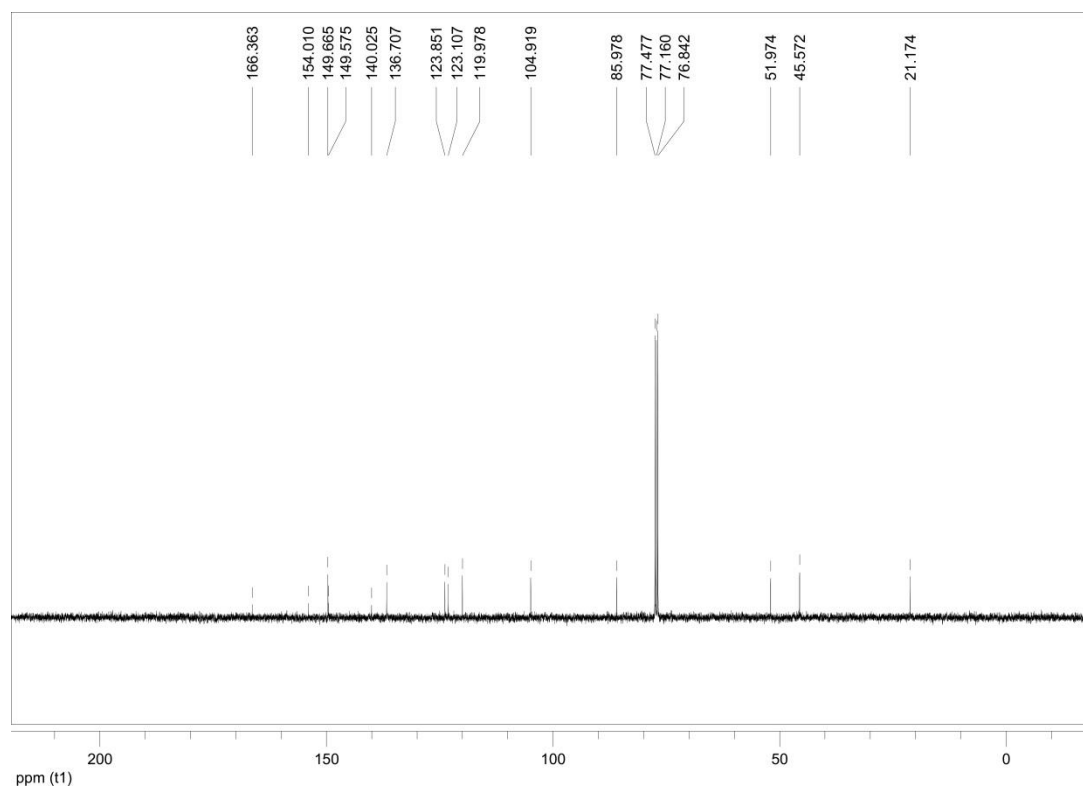



**methyl 2-((2S,3R)-2,3-dihydro-3-phenyl-5-(pyridin-3-yl)furan-2-yl)acrylate (5a)**

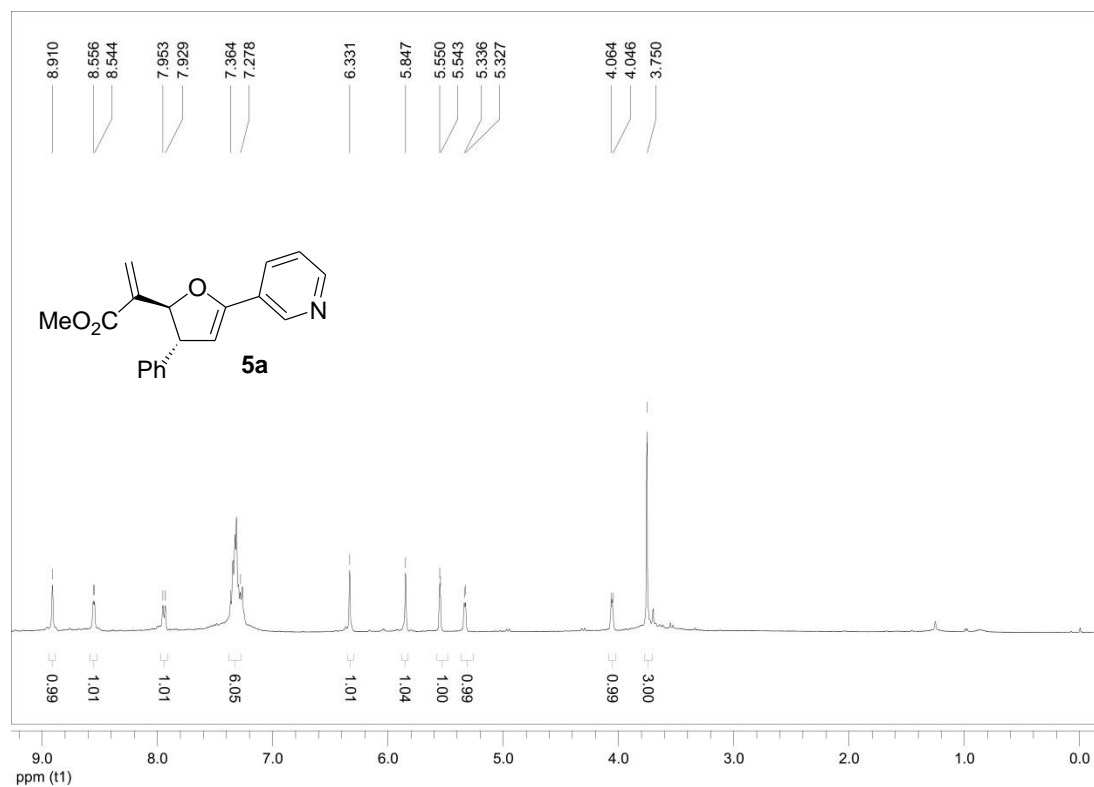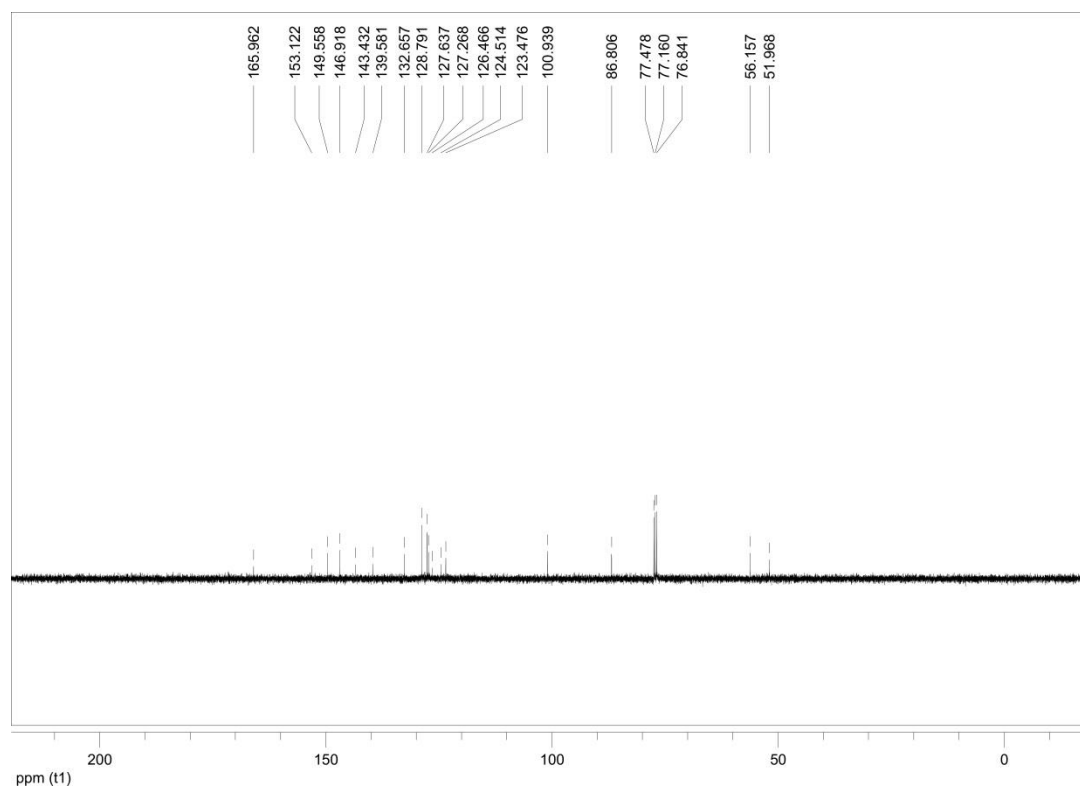

**methyl 2-((2S,3R)-2,3-dihydro-3-phenyl-5-(pyridin-4-yl)furan-2-yl)acrylate (7a)**

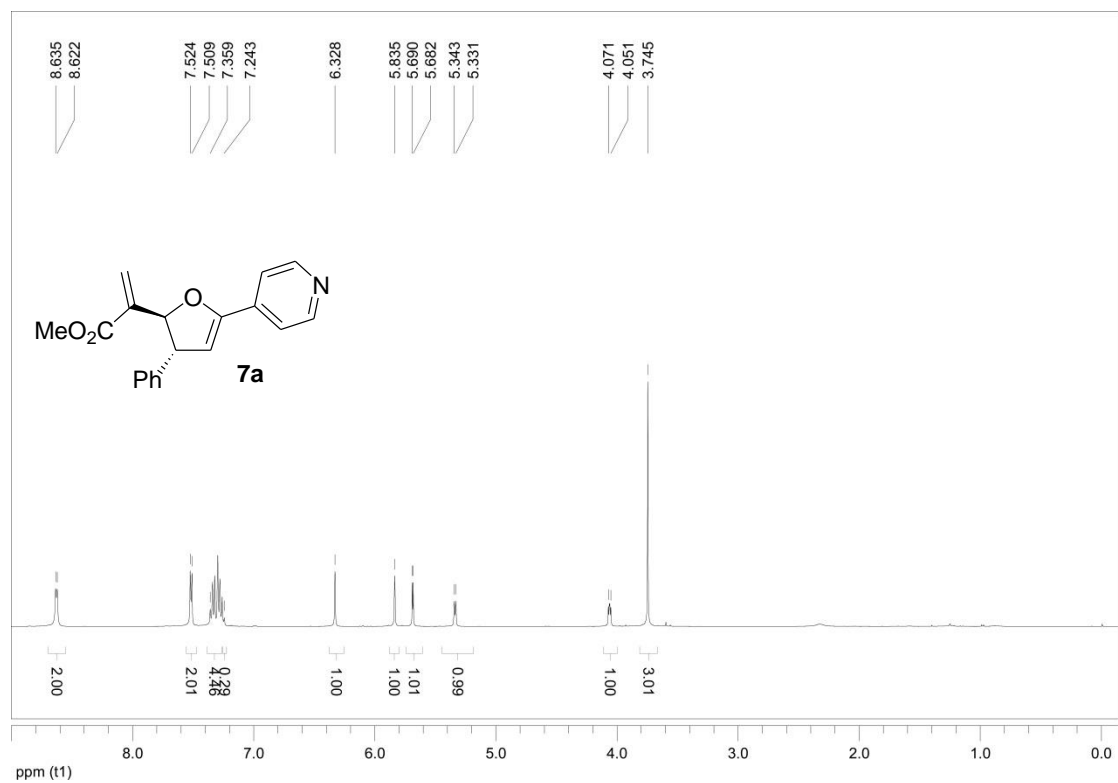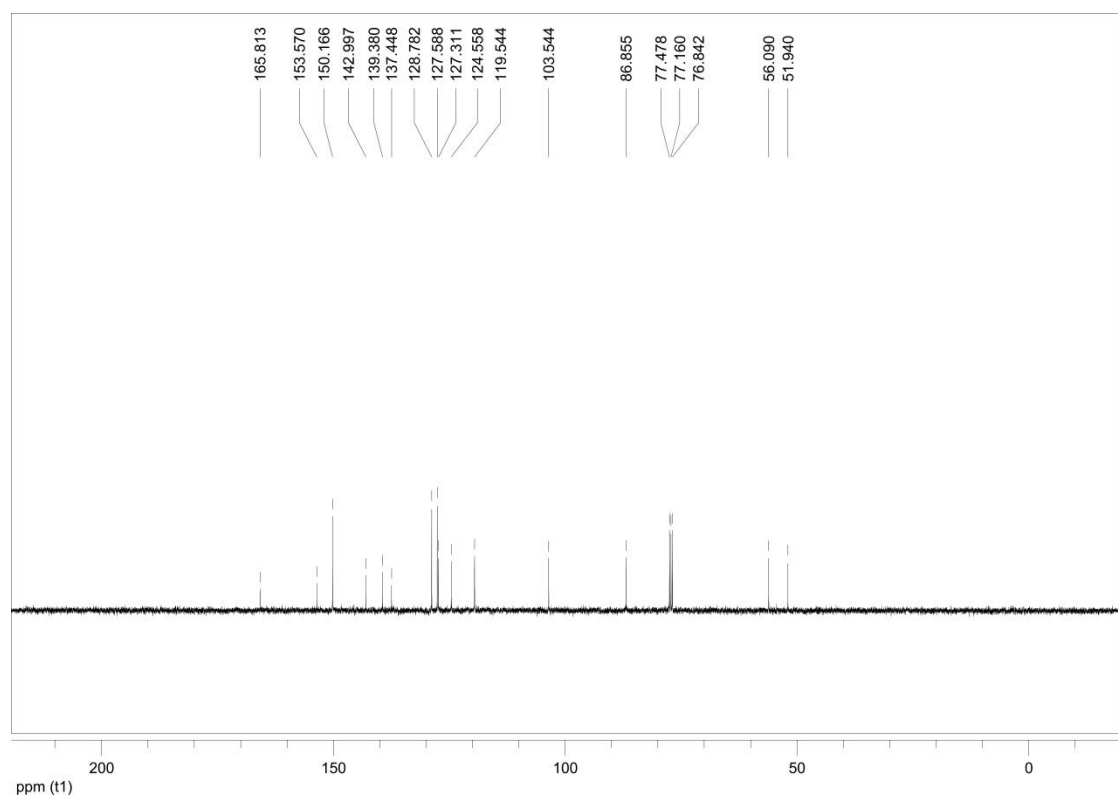

Supplement: c8ra09453e1.pdf [file c8ra09453e1.pdf]
